# Supplementary material for: Non-Invasive Technical Investigation of English Portrait Miniatures Attributed to Nicholas Hilliard and Isaac Oliver
Source: MDPI journal article supplement (doi:10.3390/heritage4030064), 2021-07-09
Supplement: s1 [file s1]

# Non-invasive technical investigation of English portrait miniatures attributed to Nicholas Hilliard and Isaac Oliver

Flavia Fiorillo <sup>1</sup>, Lucia Burgio <sup>2</sup>, Christine Slottved Kimbriel <sup>3</sup> and Paola Ricciardi <sup>1,\*</sup>

<sup>1</sup>The Fitzwilliam Museum, University of Cambridge, CB2 1RB Cambridge, UK

<sup>2</sup>Victoria and Albert Museum, SW7 2RL London, UK

<sup>3</sup>Hamilton Kerr Institute, University of Cambridge, CB22 4NE Cambridge, UK

\*Correspondence: pr364@cam.ac.uk

## Supplementary Materials – XRF and Raman results

### P.154-1910 – Richard Hilliard

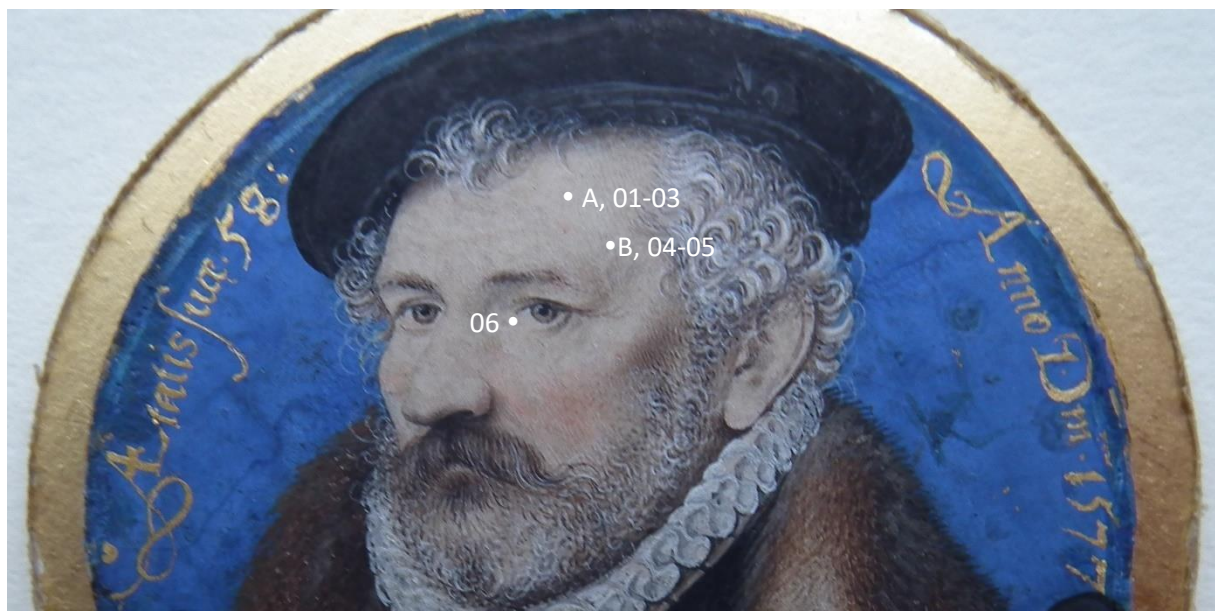

Analysis sites: numbers mark Raman spots, letters indicate XRF spots.

| Area                      | Detail                           | XRF                      | Raman                           | Visual examination                                                                      |
|---------------------------|----------------------------------|--------------------------|---------------------------------|-----------------------------------------------------------------------------------------|
| Flesh tones (A-B, 01- 05) | Top, proper left side, and cheek | <u>Pb</u> , Fe, Ca, (Hg) | Hematite, amorphous iron oxides | White matrix with dull orange, dull red, maroon and some yellow particles               |
| Inner corner (06)         | Proper left eye                  | -                        | Hematite                        | made of a lake, with very few maroon particles, some black and occasional orange ones   |
| Eyelid                    | Proper left eye                  | -                        | Carbon black, vermillion        | made of black and dark brown particles, and a lake may or may not be present            |
| Eyebrow                   | Proper left eye                  | -                        | -                               | It is a more diluted version of the eyelid line, with more brown and occasional orange. |

### P.155-1910 – Self-portrait, aged 30

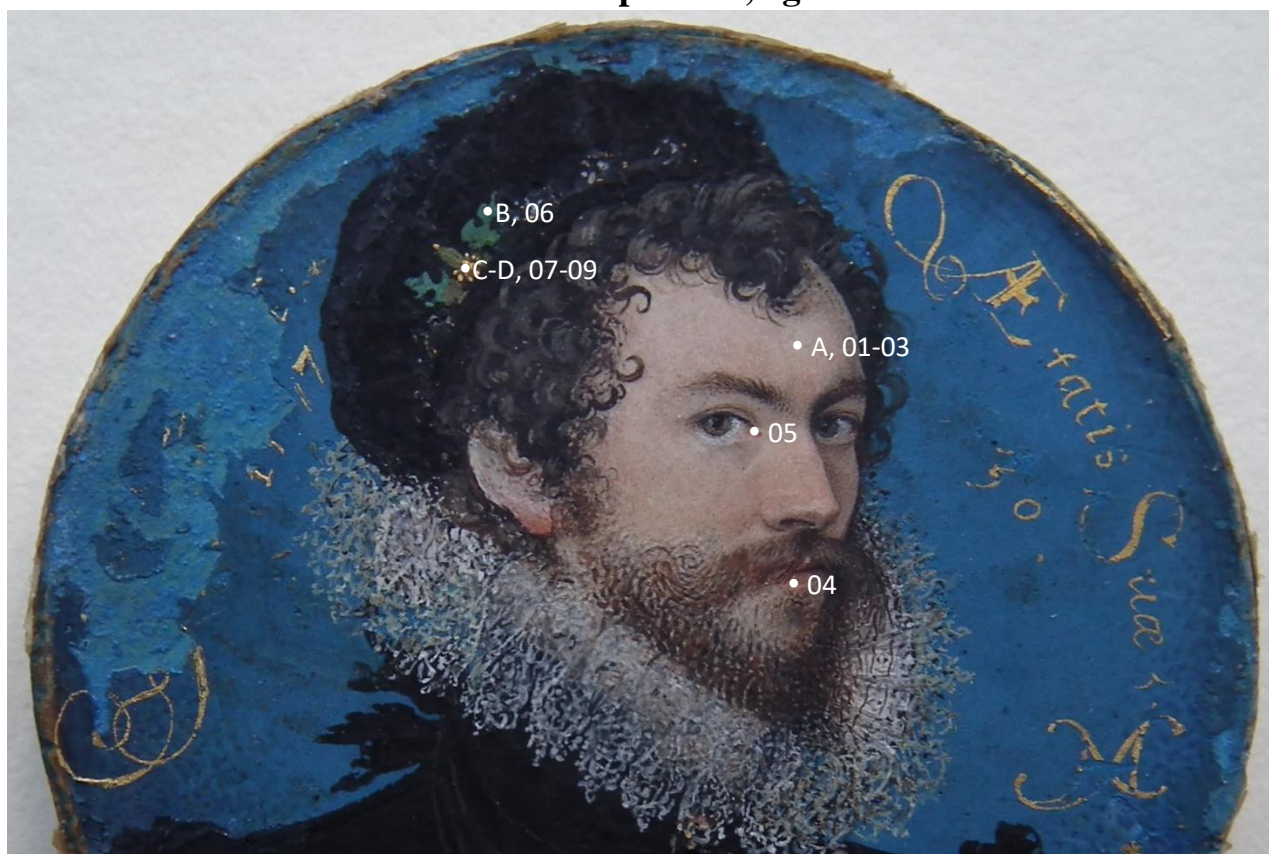

Analysis sites: numbers mark Raman spots, letters indicate XRF spots.

| Area                                  | Detail                | XRF                              | Raman                        | Visual examination                                                     |
|---------------------------------------|-----------------------|----------------------------------|------------------------------|------------------------------------------------------------------------|
| Flesh tones (A, 01-03)                | Top, proper left side | <u>Pb</u> , Au, Fe, Ca, (Cu)     | vermilion, hematite          | White matrix with crimson and maroon particles                         |
| Mouth (04)                            |                       | -                                | vermilion                    | The horizontal line of the mouth has a high content of a burgundy lake |
| Inner corner (05)                     | PR eye                | -                                | vermilion                    |                                                                        |
| Cap – green (B, 06)                   |                       | <u>Cu</u> , Au, Pb, Ca, (Fe)     | brochantite                  |                                                                        |
| Cap – orange under gilding (C, 07-08) |                       | <u>As</u> , Fe, Pb, Ca, Au, (Cu) | pararealgar, lead tin yellow |                                                                        |
| Cap – yellow under gilding (D, 09)    |                       | <u>Pb</u> , <u>Sn</u> , Cu, Au   | lead tin yellow I            |                                                                        |

## E. 1178-1988 – Unknown man

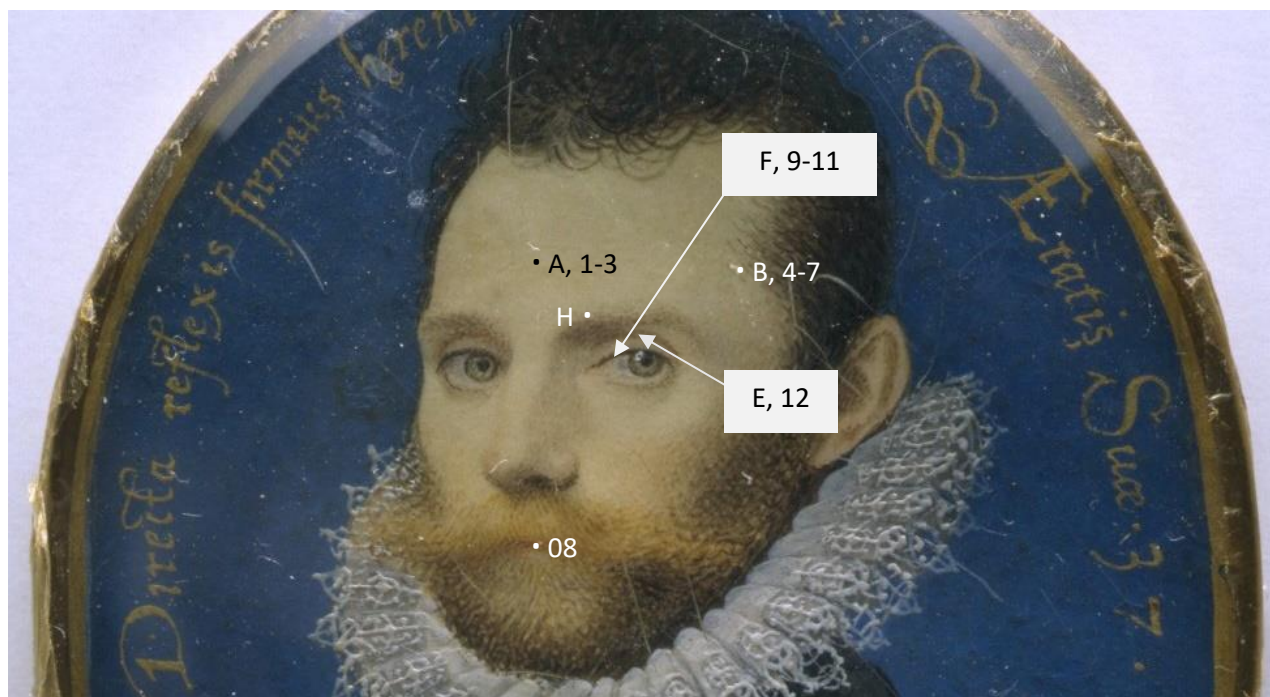

Analysis sites: numbers mark Raman spots, letters indicate XRF spots.

| Area                         | Detail                             | XRF                                     | Raman                                                            | Visual examination                                                                                                                        | Notes                                                                          |
|------------------------------|------------------------------------|-----------------------------------------|------------------------------------------------------------------|-------------------------------------------------------------------------------------------------------------------------------------------|--------------------------------------------------------------------------------|
| Flesh tones<br>(A, B, 1-7)   | Forehead<br>(A, 1-3)               | <b>Pb</b> , Ca,<br>Fe,<br>(Mn),<br>(Hg) | Vermilion, red<br>lead, hematite,<br>(disordered)<br>pararealgar | White surface scattered<br>with crimson red, dark<br>orange, maroon and dull<br>orange particles                                          | Pararealgar was<br>found only in one<br>case                                   |
|                              | Temple<br>(bluer area)<br>(B, 4-7) | <b>Pb</b> , Ca,<br>Fe, (Mn)             | Carbon black,<br>pararealgar                                     | Dark brown, maroon and<br>bright yellow particles                                                                                         | Hematite (no spectra<br>collected)                                             |
| Mouth<br>(08)                | Central area                       | -                                       | -                                                                | Particles that looked like<br>vermilion mixed with<br>black ones                                                                          | Probably a mixture<br>of vermilion, carbon<br>black and a pink lake            |
| Eyes<br>(C- E, 12,<br>16-19) | Inner corner                       | <b>Pb</b> , Hg,<br>Ca, Fe               | Vermilion                                                        | Crimson red particles                                                                                                                     |                                                                                |
|                              | Eyelash<br>(C, 9-11)               | <b>Pb</b> , Fe,<br>Ca, (Cu)             | Vermilion,<br>hematite(?),<br>carbon black                       | First discontinued line,<br>made of finely divided red<br>particles. Second dark<br>brown line: black particles<br>in a medium-rich layer |                                                                                |
|                              | Eyelid<br>(D, 12)                  | <b>Pb</b> , Fe,<br>Ca                   | -                                                                | Finely divided vermilion-<br>like particles mixed with<br>black and brown                                                                 | The second line<br>appears brown in<br>comparison to the<br>black eyelash line |



## P.21-1942 - Unknown man clasping a hand from a cloud

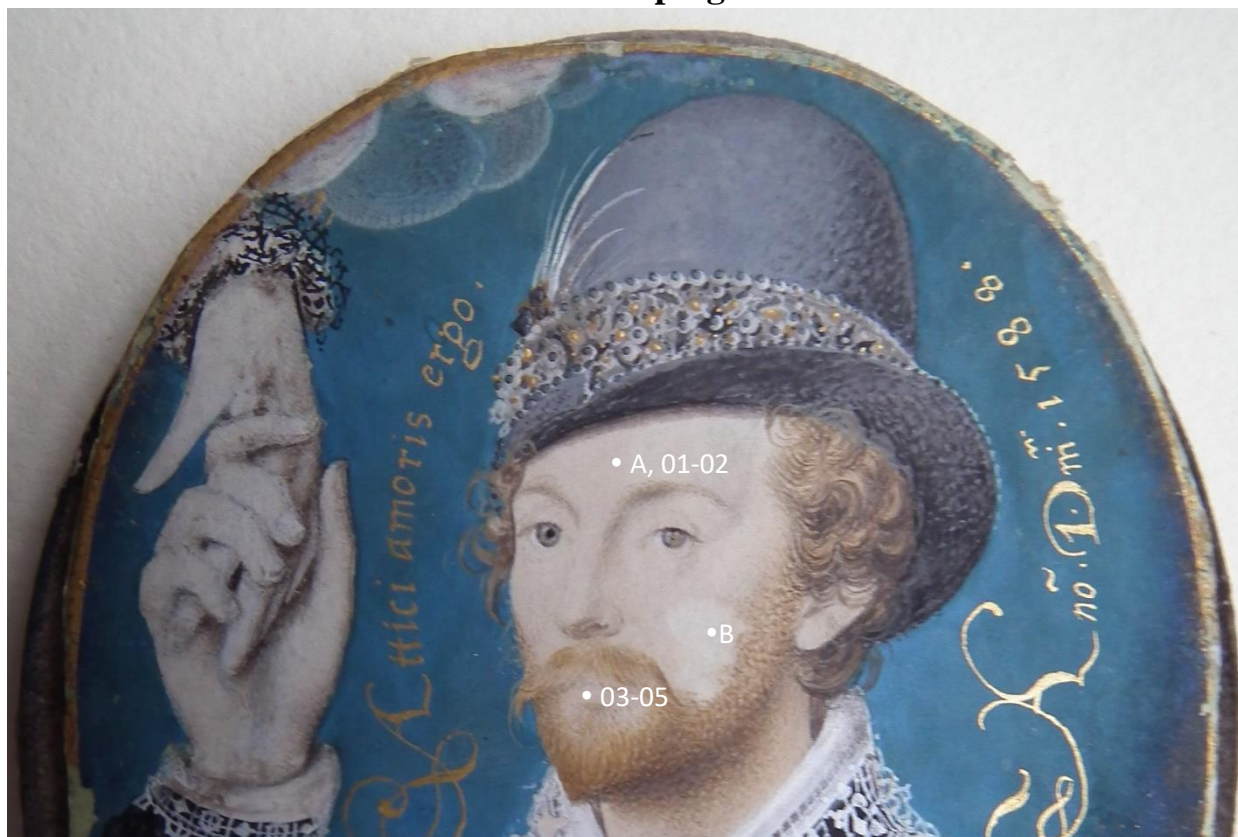

Analysis sites: numbers mark Raman spots, letters indicate XRF spots.

| Area                          | Detail   | XRF                | Raman                                        | Visual examination                                                                                 |
|-------------------------------|----------|--------------------|----------------------------------------------|----------------------------------------------------------------------------------------------------|
| Flesh tones<br>(A, B, 01, 02) | forehead | <u>Pb</u> , Fe, Ca | Hematite, vermillion,<br>lead white, calcite | Light orange, light red, bright<br>yellow and occasional maroon<br>particles were seen             |
| Mouth (03-05)                 |          | -                  | Red lead, ultramarine                        | Many orange particles, rare<br>blue ones                                                           |
| Inner corner                  | PL eye   | -                  | -                                            | Only the regular flesh tones<br>were seen, no additional<br>pigment was used to mark the<br>corner |

### P.8-1945 – Unknown Lady

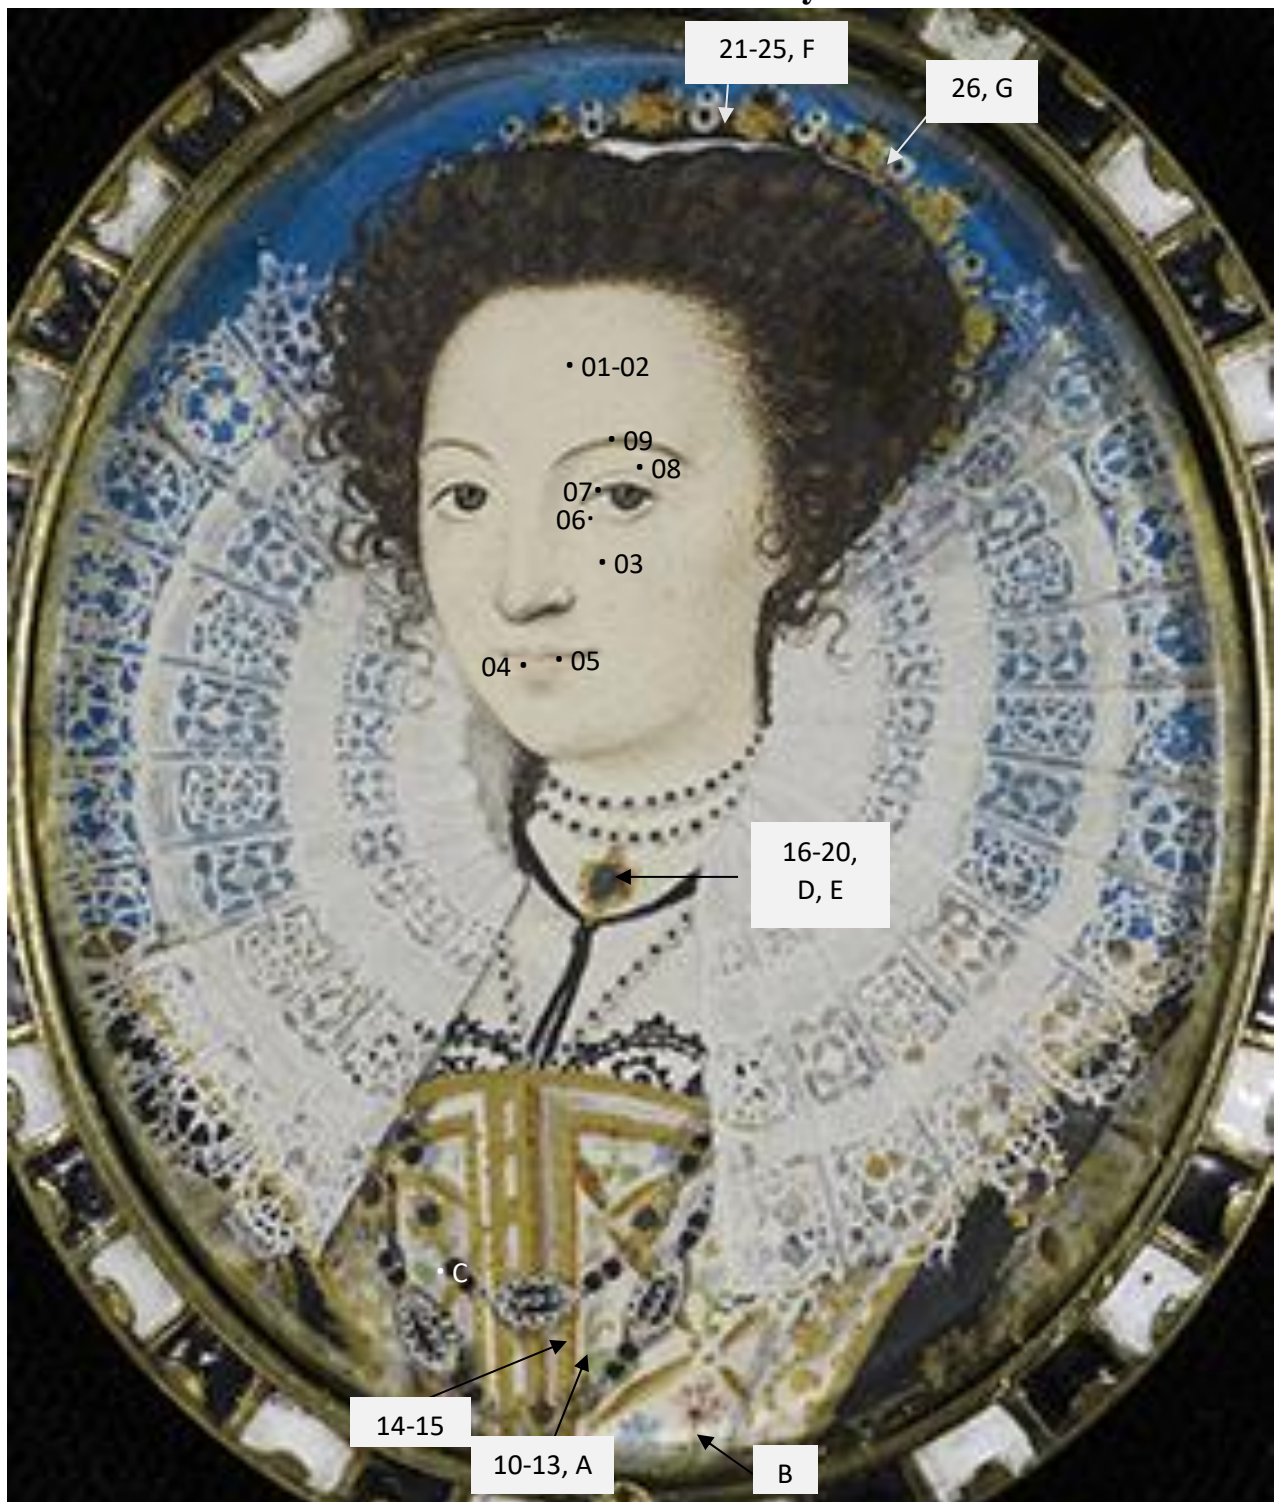

Analysis sites: numbers mark Raman spots, letters indicate XRF spots.

| Area                       | Detail                | XRF                       | Raman                                                                                           | Visual examination                                                                                         | Notes                                                         |
|----------------------------|-----------------------|---------------------------|-------------------------------------------------------------------------------------------------|------------------------------------------------------------------------------------------------------------|---------------------------------------------------------------|
| Flesh tones (01-03)        | Forehead and PL cheek | -                         | Red lead, azurite, goethite                                                                     | Mixture of white, black, blue, orange particles (orange and dull orange)                                   | Yellow dye                                                    |
| Mouth (04, 05)             |                       | -                         | Red lead                                                                                        | Mixture of red lead, lead white, pink dye and carbon black                                                 | Gold paint was also present                                   |
| Eyes (06-10)               | Inner corner (06)     | -                         | Red lead                                                                                        | Orange particles mixed with black ones                                                                     |                                                               |
|                            | Eyelash line (07)     | -                         | Carbon black                                                                                    | Outer side: mixture of black and brown particles<br>Inner side: indigo or very finely divided carbon black | 2 <sup>nd</sup> black line applied on top                     |
|                            | Eyelid line (08)      | -                         | -                                                                                               | mixture of white and finely divided black or blue particles                                                | It looked like carbon/soot                                    |
|                            | Eyebrow (09)          | -                         | -                                                                                               | Mixture of black and brown                                                                                 |                                                               |
| Dress (A-C, 10-15)         | Green details (10-13) | <b>Cu, Pb, Ca, Fe</b>     | Azurite, indigo, lead white and calcite                                                         | Mixture of blue and bright yellow particles                                                                | Raman spectrum of a bright yellow crystal not identified      |
|                            | Orange lace (14,15)   |                           | Pararealgar (intermediate phase)                                                                | Dark orange particles                                                                                      |                                                               |
| Neck pendant (D, E, 16-20) | Dark orange area      | <b>Pb, Fe, As, Sn, Ca</b> | Pararealgar (intermediate phase)<br>Lead tin yellow type I                                      | Mixture of dark orange and bright yellow particles and rare dark red ones (hematite?)                      |                                                               |
|                            | Pale orange area      | <b>Pb, Fe, As, Sn, Ca</b> | Lead tin yellow type I<br>Pararealgar (intermediate phase)<br>Red lead                          | Mixture of pale yellow and dull orange particles and a few bright orange ones                              |                                                               |
| Tiara (F, G, 21-26)        | Dark orange           | <b>Cu, Pb, Fe, K, As</b>  | Red lead<br>Pararealgar (intermediate phase)<br>Lead tin yellow type I<br>Massicot (1 particle) | mixture of pale yellow, warm yellow, bright orange and light brown and dark orange particles               | The dark orange crystals gave no Raman spectrum (iron oxide?) |
|                            | Yellow                | <b>Cu, Pb, Fe, Sn</b>     | Lead tin yellow type I                                                                          | Uniform pale yellow pigment                                                                                |                                                               |



## P.5-1944 – Unknown man

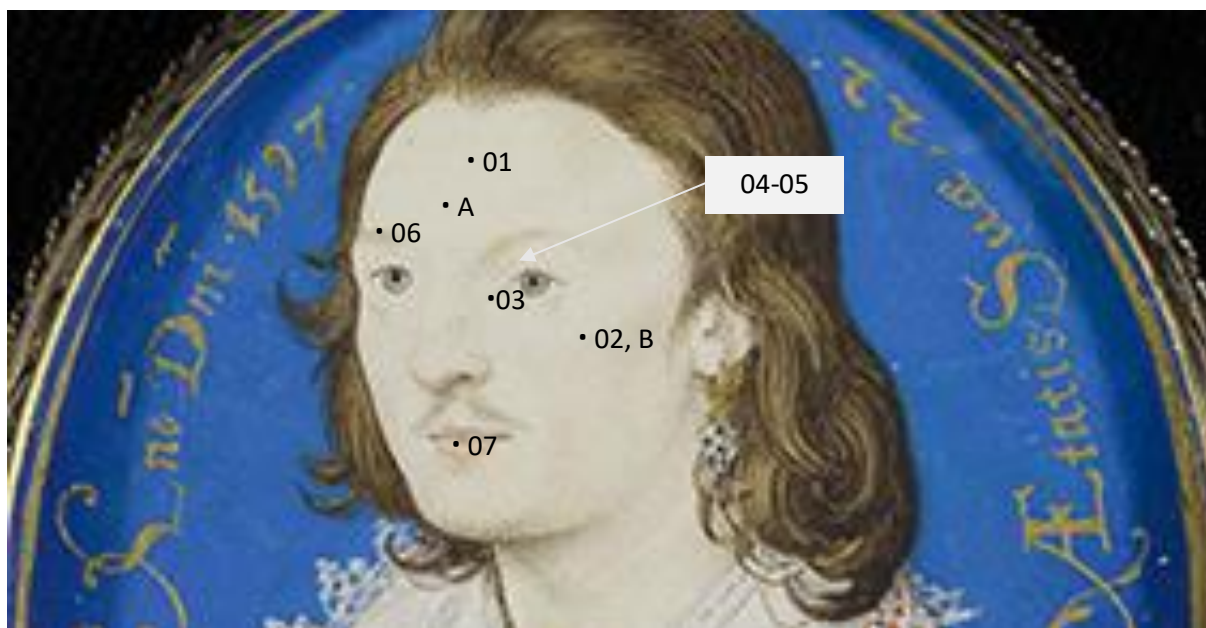

Analysis sites: numbers mark Raman spots, letters indicate XRF spots.

| Area                         | Detail               | XRF        | Raman                                    | Visual examination                                                                               |
|------------------------------|----------------------|------------|------------------------------------------|--------------------------------------------------------------------------------------------------|
| Flesh tones<br>(A-B, 01, 02) | Forehead             | Pb, Ca, Fe | red lead, lead tin<br>yellow I           | White matrix scattered with a few<br>orange and pale yellow particles                            |
|                              | PL cheek             | Pb, Ca, Fe | red lead, lead tin<br>yellow I, hematite | White matrix scattered with a few<br>orange and pale yellow particles<br>and a few dark red ones |
| Eyes<br>(03-06)              | Inner corner<br>(03) | -          | no signal                                | Pale pink dye                                                                                    |
|                              | Eyelash line<br>(04) | -          | carbon black                             | Mixture of black and brown<br>particles                                                          |
|                              | Eyelid line<br>(05)  | -          | carbon black                             | Diluted mixture of black and brown<br>particles                                                  |
|                              | Eyebrow<br>(06)      | -          | carbon black                             | Mixture of black, brown and dark<br>yellow particles                                             |
| Mouth<br>(07)                |                      | -          | vermilion                                | Mostly vermilion                                                                                 |

### P.5-1917 - Unknown young man against a background of flames

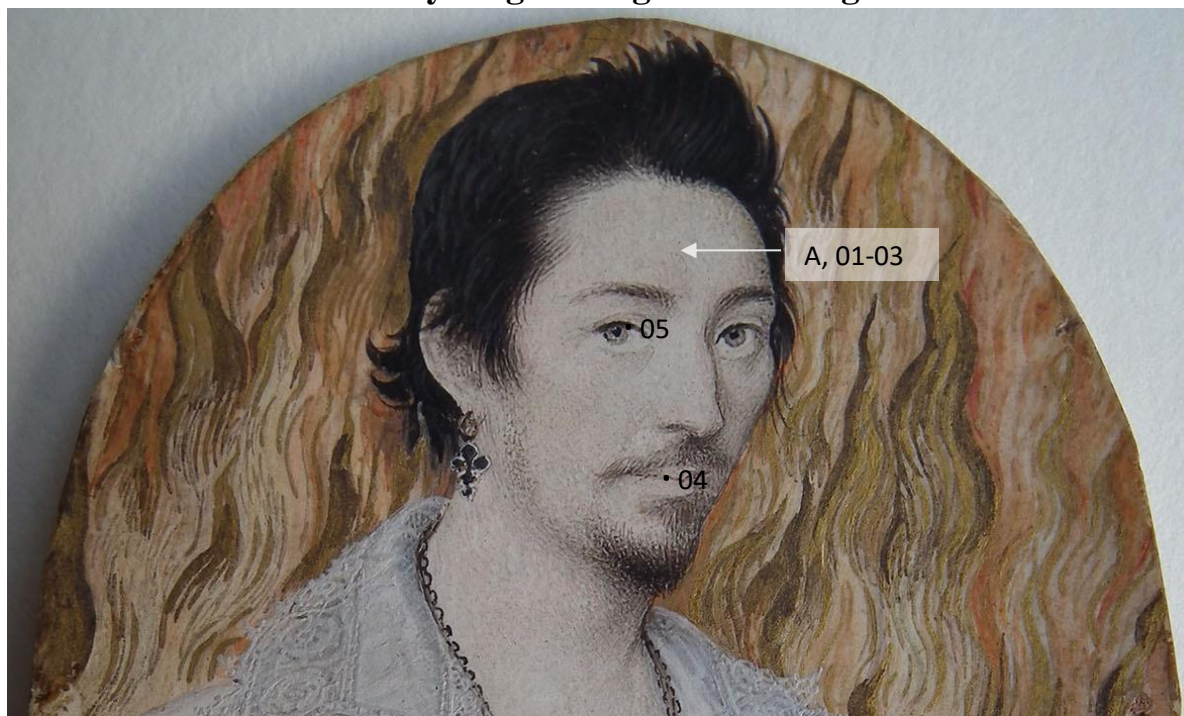

Analysis sites: numbers mark Raman spots, letters indicate XRF spots.

| Area                      | Detail           | XRF                | Raman                         | Visual examination                                                  |
|---------------------------|------------------|--------------------|-------------------------------|---------------------------------------------------------------------|
| Flesh tones (A, 01-03)    | Forehead         | <b>Pb</b> , Fe, Ca | vermilion, hematite, red lead | White matrix with crimson particles and rare maroon and orange ones |
| Mouth (04)                | -                | -                  | no signal                     | It appears painted only with a lake                                 |
| Inner corner              | -                | -                  | -                             | no pigment present                                                  |
| Eyes – eyelash lines (05) | proper right one | -                  | carbon black                  | mixture of dark brown and black particles                           |



## FM 3882 – Unknown man

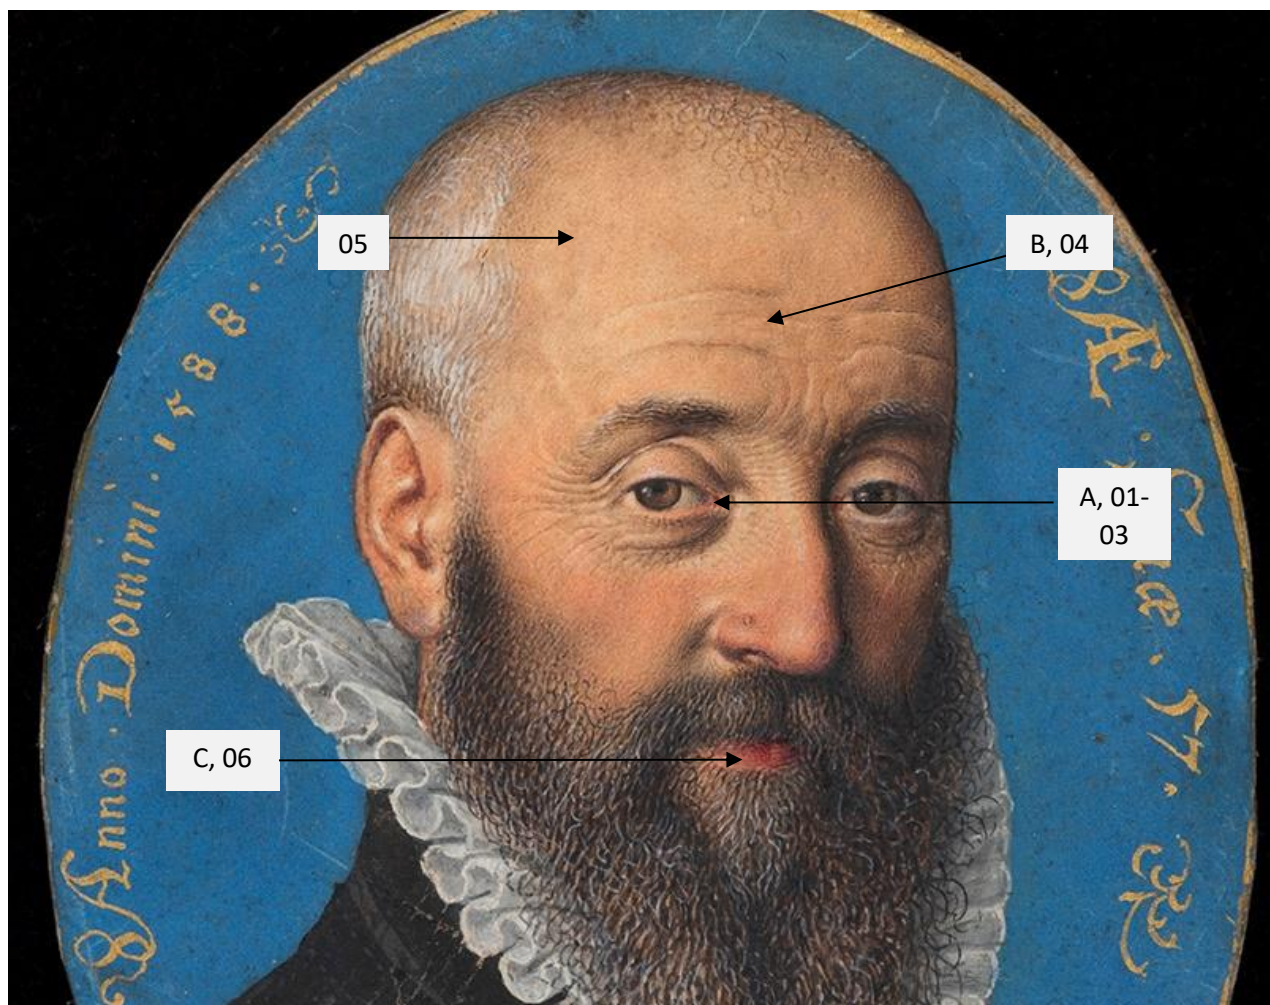

Analysis sites: numbers mark Raman spots, letters indicate XRF spots.

| Area                   | Detail                                    | XRF                        | Raman             | Visual examination                                                                                                     | Notes                                                                                              |
|------------------------|-------------------------------------------|----------------------------|-------------------|------------------------------------------------------------------------------------------------------------------------|----------------------------------------------------------------------------------------------------|
| Eyes (A, 01-03)        | Proper left inner corner                  | Pb, Ca, Fe, Hg             | Indigo, vermilion | Finely divided black and dark blue particles, some tiny red ones                                                       | Carbon black                                                                                       |
| Flesh tones (B, 04-05) | Forehead, on the centre and near the hair | Ca, Pb, Fe, Al, Si, Cl, Hg | Vermilion         | White matrix with black and red particles                                                                              | Lead white, carbon black<br>Higher amount of red and black particles on the central area (spot 04) |
| Mouth (C, 06)          |                                           | Ca, Pb                     | Vermilion         | Red lake covering the mouth. On the proper right side the lake is thinner and some red and black particles can be seen | Red lake                                                                                           |

## FM 3883 – Unknown woman

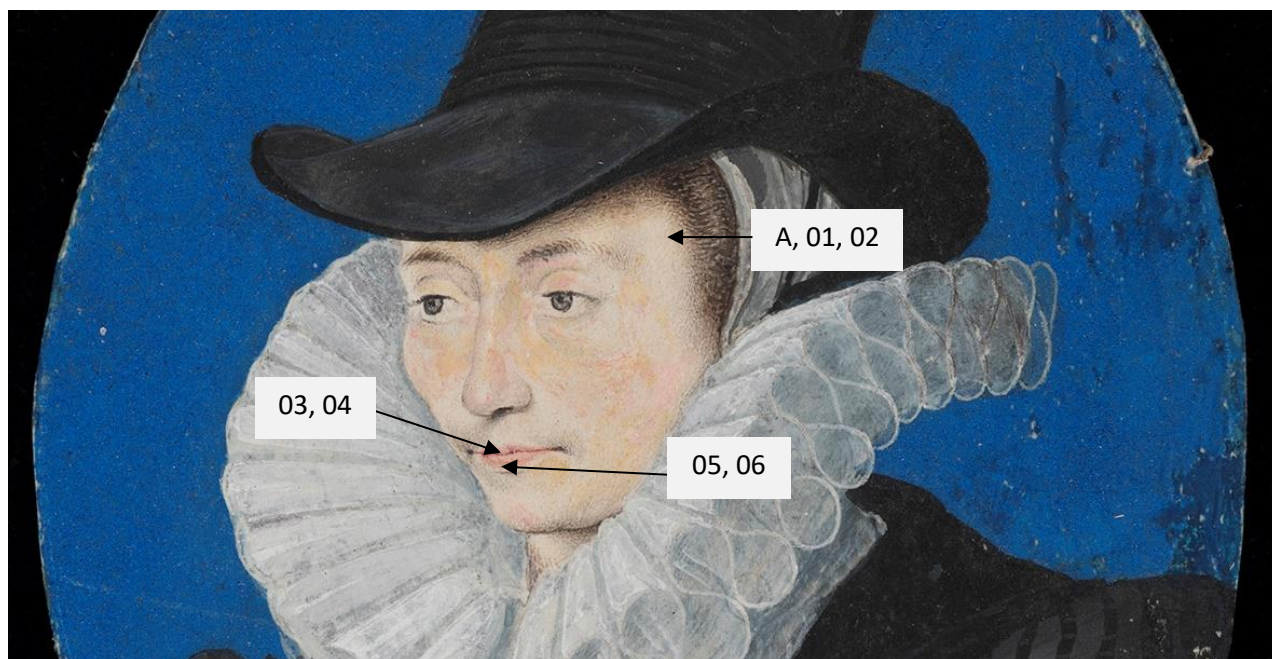

Analysis sites: numbers mark Raman spots, letters indicate XRF spots.

| Area                    | Detail                    | XRF     | Raman               | Visual examination                                                                                                                                         | Notes                                        |
|-------------------------|---------------------------|---------|---------------------|------------------------------------------------------------------------------------------------------------------------------------------------------------|----------------------------------------------|
| Flesh tones (A, 01, 02) | Temple and under the nose | Pb      | Red lead, vermilion | Mostly white with a few orange and pale blue particles, and rare red ones. Some bright yellow staining.                                                    | Azurite?                                     |
| Lips (B, 03-06)         | Upper and lower lip       | Pb, Hg? | Vermilion, red lead | Upper lip: pale pink lake and orange particles underneath. Darker pink lake on the central line.<br>Lower lip: pale pink lake and red particles underneath | Pale pink and darker pink lakes not detected |



## P.145-1910 – Young Lady holding an apple

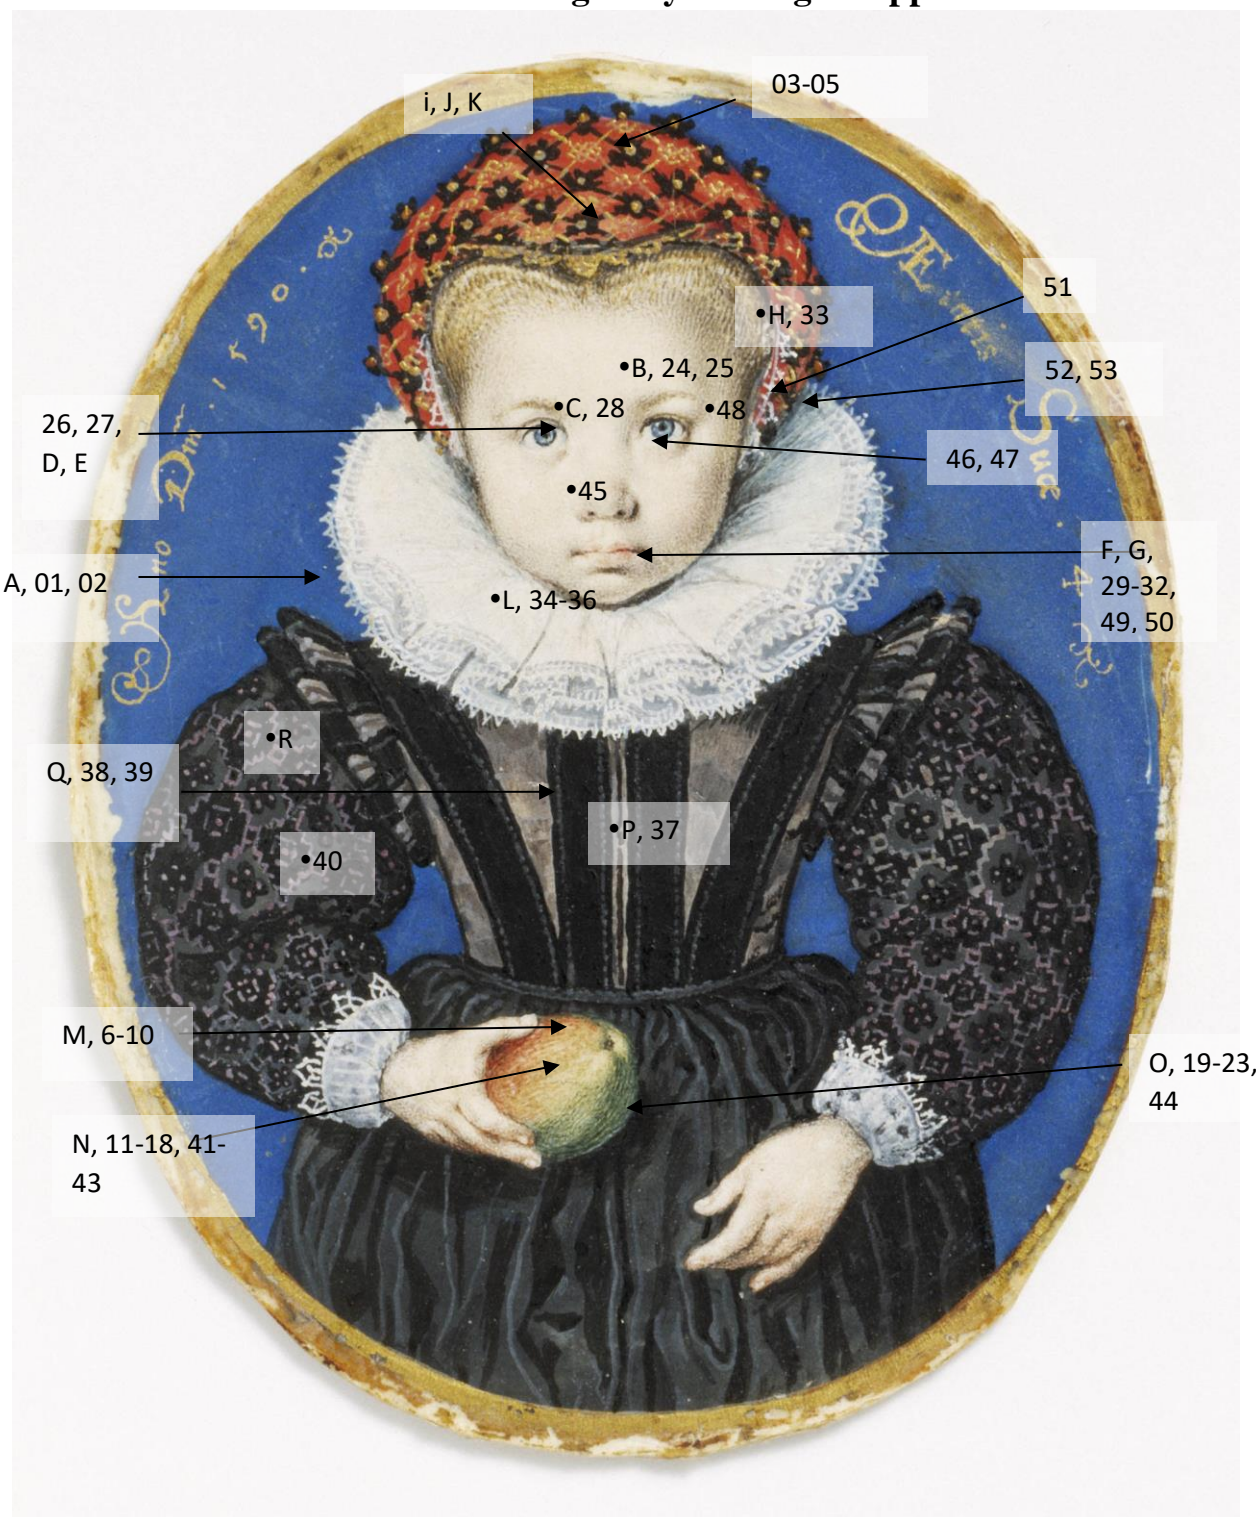

Analysis sites: letters indicate XRF spots, numbers mark Raman spots.



| Area                       | Detail<br>(analysis sites) | XRF                                | Raman                          | Visual examination                                                                  | Notes                                                                             |
|----------------------------|----------------------------|------------------------------------|--------------------------------|-------------------------------------------------------------------------------------|-----------------------------------------------------------------------------------|
| Blue background            | Left side (A, 01, 02)      | <b>Cu</b> , Pb, (Ca), Fe           | Azurite, (quartz)              | A few orange, brown and translucent white particles within the subdued blue matrix. |                                                                                   |
| Flesh tones                | Forehead (B, 24, 25)       | <b>Pb</b> , Fe, Ca                 | Lead white, vermilion          | White and bright with very fine red and black particles                             |                                                                                   |
|                            | PR cheek (45)              |                                    | Vermilion, red lead            | Red particles and a few orange ones                                                 |                                                                                   |
|                            | Pink area (under lips) (G) | <b>Pb</b> , Fe, Ca                 | Hematite, indigo               | Tiny dark red, maroon particles                                                     |                                                                                   |
| Eyebrow                    | Left one (C, 28)           | <b>Pb</b> , Ca, Fe, Cu             | -                              | Some brown particles                                                                | The presence of carbon black is assumed, but no spectra were obtained             |
| Eyes                       | White glint (D)            | <b>Pb</b> , Fe, Ca                 | Lead white                     | In relief, purely white                                                             |                                                                                   |
|                            | Blue iris (E, 26, 27)      | <b>Pb</b> , Fe, Ca, (Cu)           | Indigo                         | Dark blue particles mixed with brown ones                                           |                                                                                   |
|                            | Inner corner (46, 47)      |                                    | Indigo, hematite, carbon black | mixture of black and maroon particles                                               |                                                                                   |
|                            | Eyelash line (48)          |                                    | Indigo, hematite, carbon black | black and maroon particles                                                          | A second thick and black line was applied only above the iris.                    |
|                            | Eyelid line                |                                    |                                |                                                                                     | Similar to the eyelash<br>A second line made of a brown pigment is applied on top |
| Lips (F, G, 29-32, 49, 50) | Lower lip, right side      | <b>Pb</b> , Fe, Ca, Cu, (Hg), (Au) | Vermilion, red lead            | Medium-sized orange particles, small-sized red ones and very fine black ones.       | Pink dye in the separation line and dark red dye in the corners<br>Carbon black   |
| Hair (H, 33)               | Right side                 | <b>Pb</b> , Fe, Mn, Ca             | Red lead                       | Stripes made of dark orange, dark brown and black particles                         | Presence of a light brown dye and gold                                            |
| Headdress (i-K)            | Red areas (i, 03, 04)      | <b>Pb</b> , Hg, Fe, Ca, (Cu)       | -                              | Red particles                                                                       |                                                                                   |
|                            | White areas (J)            | <b>Pb</b> , Hg, Fe, Ca, (Cu), K    | Vermilion, carbon black        | Very finely divided red and black particles                                         | Presence of a pale pink lake<br>K-containing compound                             |

|                    |                                 |                                          |                                                                          |                                                                                                                                      |                                                                         |
|--------------------|---------------------------------|------------------------------------------|--------------------------------------------------------------------------|--------------------------------------------------------------------------------------------------------------------------------------|-------------------------------------------------------------------------|
|                    | Gold areas (K)                  | <b>Au</b> , Cu, Fe                       | -                                                                        | -                                                                                                                                    | The gold is applied on the white                                        |
|                    | Black areas (05)                | -                                        | Carbon black                                                             | Black particles                                                                                                                      |                                                                         |
|                    | Blue line (51)                  |                                          | Indigo                                                                   | Finely divided blue particles                                                                                                        |                                                                         |
|                    | Orange areas (52, 53)           |                                          | Pararealgar                                                              |                                                                                                                                      |                                                                         |
| Ruff (L, 33, 34)   | Left side                       | <b>Pb</b> , Ca, Fe                       | Lead white, azurite, indigo                                              | Some blue and very finely divided black particles                                                                                    | Details in relief are pure lead white. Blue particles look like azurite |
| Dress (P-R, 37-40) | Black stripes (P, 37)           | <b>P</b> , Ca, <b>Pb</b> , Fe            | Carbon black (bone black)                                                | Black particles                                                                                                                      |                                                                         |
|                    | Pink stripes (Q, 38, 39)        | Ca, <b>Pb</b> , Fe, Cu, Co               | Massicot, vermillion, indigo                                             | White, beige, dark red, light blue and purplish blue, finely divided black particles.                                                | Blue particles look like azurite and smalt                              |
|                    | Pink details on sleeves (R, 40) | <b>Pb</b> , Cu, Fe, Ca, (Hg)             | Indigo                                                                   |                                                                                                                                      | Presence of a pink lake                                                 |
| Apple (M-O, 6-10)  | Red area (M, 6-10)              | <b>Pb</b> , <b>Hg</b> , Ca, Fe, (Cu), Sn | Lead white, vermillion, lead tin yellow (type I), massicot, carbon black | White, red, medium-sized pale yellow, dull orange and occasional black particles, large dark or black boulders in the shadowed areas |                                                                         |
|                    | Yellow area (N, 11-18, 41-43)   | <b>Pb</b> , Hg, Ca, Fe, (Cu), Sn         | Massicot, lead tin yellow (type I), vermillion, carbon black, indigo     | Dull orange, pale yellow, red, blue particles                                                                                        |                                                                         |
|                    | Green area (O, 19-23, 44)       | <b>Pb</b> , Ca, Fe, Cu, Sn               | Carbon black, indigo, azurite, lead tin yellow (type I), massicot        | Very finely divided black particles mixed with medium-sized pale yellow, dull orange and blue ones                                   |                                                                         |

# P.146-1910 - Young Lady holding a carnation

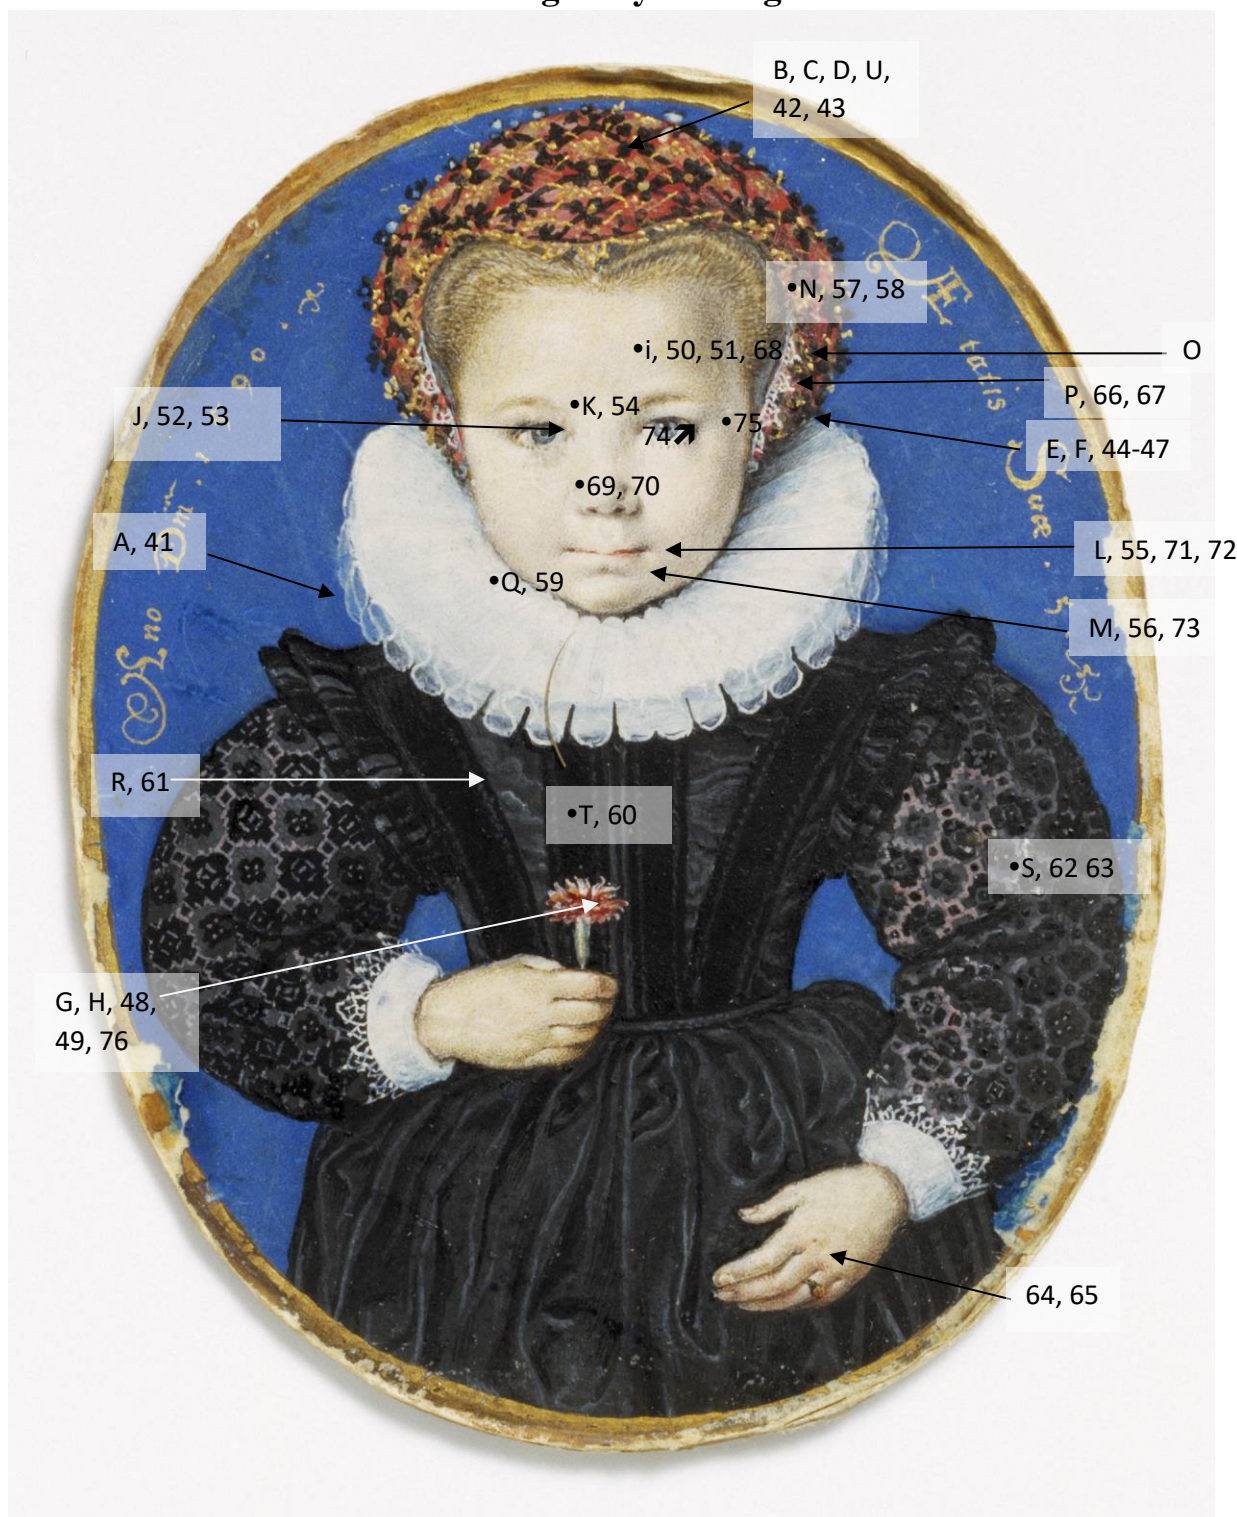

Analysis sites: letters indicate XRF spots, numbers mark Raman spots.



| Area                                   | Detail                             | XRF                      | Raman                                   | Visual examination                                                                                                                                                                                                 | Notes                                                                                                                                                              |
|----------------------------------------|------------------------------------|--------------------------|-----------------------------------------|--------------------------------------------------------------------------------------------------------------------------------------------------------------------------------------------------------------------|--------------------------------------------------------------------------------------------------------------------------------------------------------------------|
| Blue background (A, 41)                | Left side                          | <b>Cu</b> , Pb, Ca, Fe   | Azurite                                 | Dark blue particles mixed with a few orange, brown and translucent white ones                                                                                                                                      |                                                                                                                                                                    |
| Flesh tones (i, M, 50,51,56, 64, 65, ) | Forehead (i, 50, 51, 68)           | <b>Pb</b> , Fe, Ca       | Lead white, indigo                      | White with finely divided black particles and a few orange ones                                                                                                                                                    | Some orange particles look like red lead, but no spectrum was collected                                                                                            |
|                                        | PR cheek (69, 70)                  |                          | Red lead, pararealgar                   | Rare orange particles and one dull orange one                                                                                                                                                                      | two or three azurite-like particles, one crystal that looked like lapis lazuli and two crystals vermilion-looking were present but may be associated to impurities |
|                                        | Pink area (under lips) (M, 56, 73) | <b>Pb</b> , Fe, Ca, (Cu) | Indigo                                  | Finely divided black particles and a few golden ones                                                                                                                                                               |                                                                                                                                                                    |
|                                        | Hands (64, 65)                     | -                        | Vermilion, carbon black                 | Black, dark brown/orange particles                                                                                                                                                                                 | Presence of a red lake/dye                                                                                                                                         |
| Eyebrow (K, 54)                        | Left one                           | <b>Pb</b> , Ca, Fe, Mn   | Carbon black                            | Black and dark brown particles with a few maroon ones                                                                                                                                                              | No signal from the dark maroon particles                                                                                                                           |
| Eyes (J, 52, 53, 74, 75)               | White glint (J, 52)                | <b>Pb</b> , Fe, Ca       | Lead white                              | In relief, purely white                                                                                                                                                                                            |                                                                                                                                                                    |
|                                        | Blue iris (53)                     | -                        | Indigo                                  | Grey with only a small portion of blue colour, made of finely divided dark blue particles                                                                                                                          |                                                                                                                                                                    |
|                                        | Eyelash line (74, 75)              |                          | Weak signal of indigo in the outer line | Inner line: red lake mixed with black and very rare orange (red lead) and red (vermilion) particles and gold paint<br><br>Outer line: black, dark brown and a few dull orange particles, and possibly a yellow dye | 2 lines: inner area is red and the outer edge is brown                                                                                                             |
|                                        | Eyelid line                        |                          |                                         |                                                                                                                                                                                                                    | Similar to the outer edge of the eyelash line                                                                                                                      |
| Lips (L, M, 71, 72)                    | Lower lip, right side              | <b>Pb</b> , Fe, Ca, (Cu) | -                                       | Inner corner: black particles scattered in a red matrix<br><br>Lips: pink lake mixed with black particles; a few azurite-like particles, and gold paint                                                            | 1 single lapis lazuli particle in the lips. Rare vermilion (possibly as impurities). Red lead belonging to the flesh tones underneath                              |

|                                            |                                     |                                           |                           |                                                                         |                                                                          |
|--------------------------------------------|-------------------------------------|-------------------------------------------|---------------------------|-------------------------------------------------------------------------|--------------------------------------------------------------------------|
| Hair<br>(N, 57, 58)                        | Right side                          | <b>Pb, Fe,</b><br>Mn, Ca                  | Carbon black              | Mixture of black, dull yellow and gold particles                        | No signal from the yellow particles                                      |
| Headdress<br>(B-D, E, O, U, 42-47, 66, 67) | Red areas (B, 42)                   | <b>Pb, Hg,</b><br>Fe, Ca                  | -                         | -                                                                       | Pure vermilion by look                                                   |
|                                            | White areas (D, 44)                 | <b>Pb,</b><br>Hg, K                       |                           | -                                                                       | Less pronounced than in P.145-1910.<br>K-containing compound             |
|                                            | Golden areas (C)                    | <b>Au,</b><br>Cu, Fe                      | -                         | -                                                                       |                                                                          |
|                                            | Black areas (U, 43)                 | <b>Pb,</b><br>Hg, Ca                      | Carbon black              | Only black crystals                                                     |                                                                          |
|                                            | Blue detail (O, P, 66,67)           | <b>Pb,</b><br>Hg,<br>Cu, Fe,<br>Mn, Ca    | Azurite                   | -                                                                       |                                                                          |
|                                            | White lace (E, F, 45-47)            | <b>Pb,</b><br>Hg,<br>Cu, Fe,<br>Mn, Ca    | Lead white                | -                                                                       | Pararealgar found in areas without lace, gold or black                   |
| Ruff<br>(Q, 59)                            | Left side                           | <b>Pb</b>                                 | Lead white, indigo        | White with some finely divided black and occasional pale blue particles |                                                                          |
| Dress<br>(R-T, 60-63)                      | Black stripes (T)                   | <b>P, Ca,</b><br><b>Pb,</b> Fe,<br>Hg, Cu | Carbon black (bone black) | -                                                                       |                                                                          |
|                                            | Pink stripes (R, 60, 61)            | <b>Pb,</b><br>Ca, Fe,<br>Cu               | Carbon black              | -                                                                       |                                                                          |
|                                            | Pink details on sleeves (S, 62, 63) | <b>Pb,</b><br>Cu, Fe,<br>Ca               | Vermilion                 | Medium-sized red, orange, black and a few gold particles                | Presence of a pink lake/dye                                              |
| Flower<br>(G, H, 48, 49, 76)               | Orange area (G, 76, 48)             | <b>Pb,</b><br>Hg,<br>Ca, Fe,<br>Cu        | Red lead                  | Mostly made of orange crystals                                          | White highlights are very fluorescent and show a weak band of lead white |
|                                            | Crimson area (H, 49)                | <b>Pb,</b><br>Hg,<br>Ca, Fe,<br>Cu        | -                         | Some medium-sized black particles scattered in a red matrix             | Presence of a red lake/dye                                               |

### P.11-1947 – Unknown gentleman

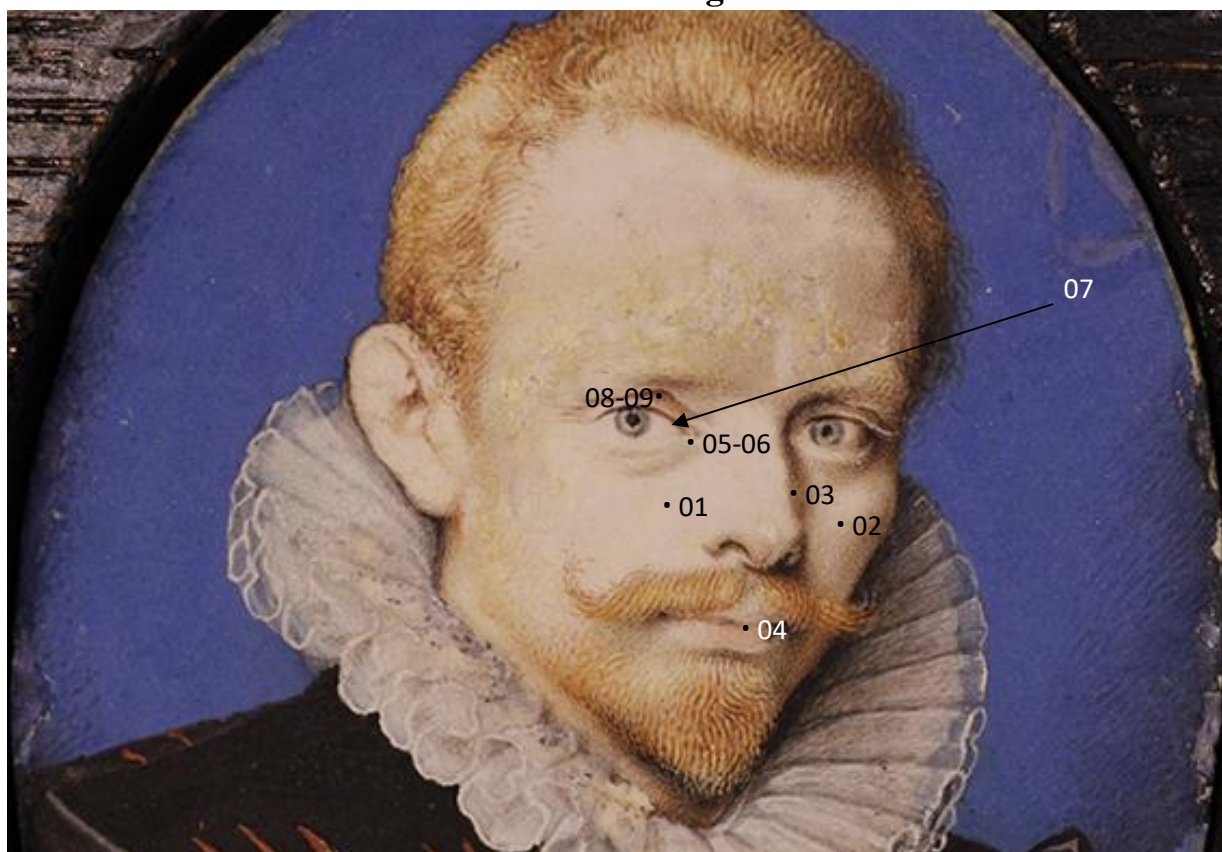

Analysis sites: numbers mark Raman spots, letters indicate XRF spots.

| Area                | Detail                | Raman                                     | Visual examination                                               | Notes                                          |
|---------------------|-----------------------|-------------------------------------------|------------------------------------------------------------------|------------------------------------------------|
| Flesh tones (01-03) | PR cheek (01)         | Red lead                                  | White matrix scattered with very sparse red and orange particles |                                                |
|                     | PL cheek (02)         | Vermilion                                 |                                                                  |                                                |
|                     | Nose (shadow) (03)    | Vermilion                                 | Mixture of black and crimson red particles                       | The presence of carbon black is suggested      |
| Mouth (04)          |                       | Vermilion                                 | The surface was made of only red particles                       | No orange particles visible                    |
| Eyes (05-09)        | Inner corner (05, 06) | Red lead, vermilion, hematite, lead white | Mixture of black, maroon, a few red and yellow particles         | The presence of carbon black is also suggested |
|                     | Eyelash line (07)     | Hematite, carbon black                    | Mixture of black and maroon particles                            | Possibly a pink lake was used                  |
|                     | Eyelid line (08, 09)  | Vermilion, hematite                       | Mixture of black and dark red particles with a few maroon ones   | The presence of carbon black is also suggested |



## IS.60-1978 – Unknown man in an Indian frame

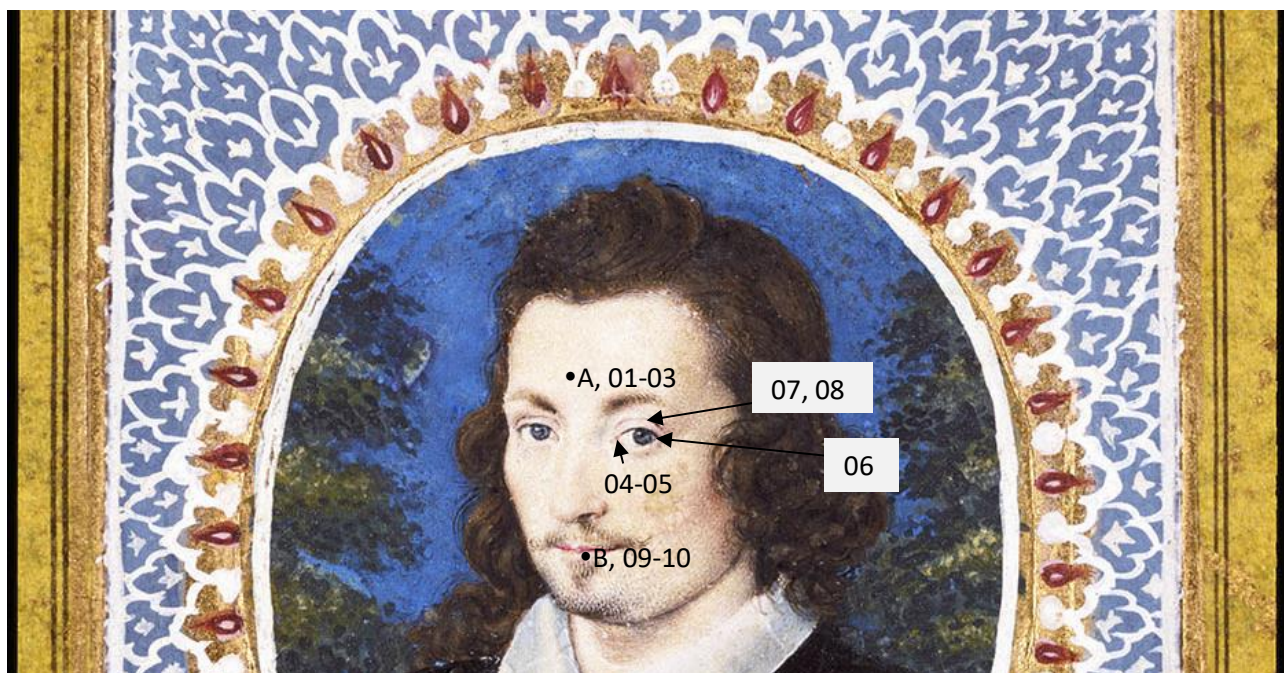

Analysis sites: letters indicate XRF spots, numbers mark Raman spots.

| Area                      | Detail                   | XRF                       | Raman                                               | Visual examination                                                            | Notes                                             |
|---------------------------|--------------------------|---------------------------|-----------------------------------------------------|-------------------------------------------------------------------------------|---------------------------------------------------|
| Flesh tones<br>(A, 01-03) | Forehead                 | <b>Pb</b> , Fe, Ca,<br>Cu | Lead white, red<br>lead, vermilion,<br>carbon black | Bright white surface,<br>with a few orange,<br>black and crimson<br>particles |                                                   |
| Inner corner<br>(04, 05)  | PL eye                   | -                         | Red lead,<br>vermilion,<br>indigo                   |                                                                               | The pink wash<br>probably is due<br>to the indigo |
| Eyelash line<br>(06)      | PL eye                   | -                         | -                                                   | Mostly black<br>particles                                                     | Likely carbon<br>black                            |
| Eyelid line<br>(07, 08)   | PL eye                   | -                         | carbon black,<br>indigo                             | Mostly black                                                                  | 2 lines                                           |
| Lips (B, 09,<br>10)       | Upper lip,<br>right side | <b>Pb</b> , Fe, Ca        | -                                                   | Light crimson and<br>black particles                                          | Red lake                                          |
|                           | Lower lip                | -                         | Red lead                                            |                                                                               |                                                   |

## FM 3868 – Unknown woman

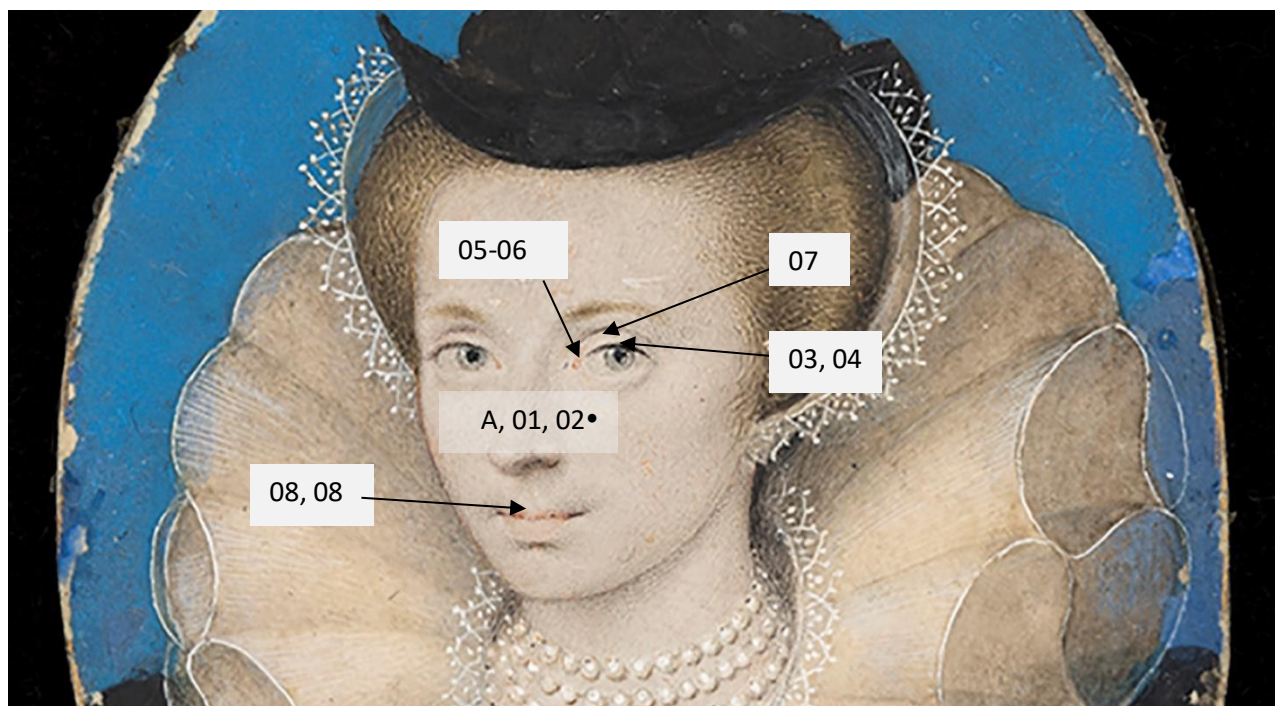

Analysis sites: numbers mark Raman spots, letters indicate XRF spots.

| Area                      | Detail                       | XRF | Raman                                          | Visual examination                                                                                  | Notes                                                                    |
|---------------------------|------------------------------|-----|------------------------------------------------|-----------------------------------------------------------------------------------------------------|--------------------------------------------------------------------------|
| Flesh tones<br>(A, 01-02) | Cheek, bright white area     | Pb  | Lead white, carbon black, red lead, vermillion | Mix of white and finely divided black with a few orange and tiny dark red                           |                                                                          |
| Right eye                 | Blue iris (03, 04)           | -   | Indigo                                         | White and finely divided dark blue and a few pale blue                                              | Possibly azurite. Lapis lazuli in one case.                              |
|                           | Inner corner (05-06)         | -   | Red lead, vermillion                           | Orange particles with crimson red and finely divided black                                          | Carbon black.<br>Brown lake?                                             |
|                           | Eyelash line (07)            | -   | Carbon black                                   | Black particles                                                                                     | Occasional almost invisible red particles, probably from the flesh tones |
| Mouth (08, 09)            | Central line and bottom lips | -   | Red lead, vermillion                           | Central line: red particles covered with a dark pink lake.<br>Top and bottom lips: orange particles | Dark pink lake                                                           |



## P.43-1941 – Unknown Lady

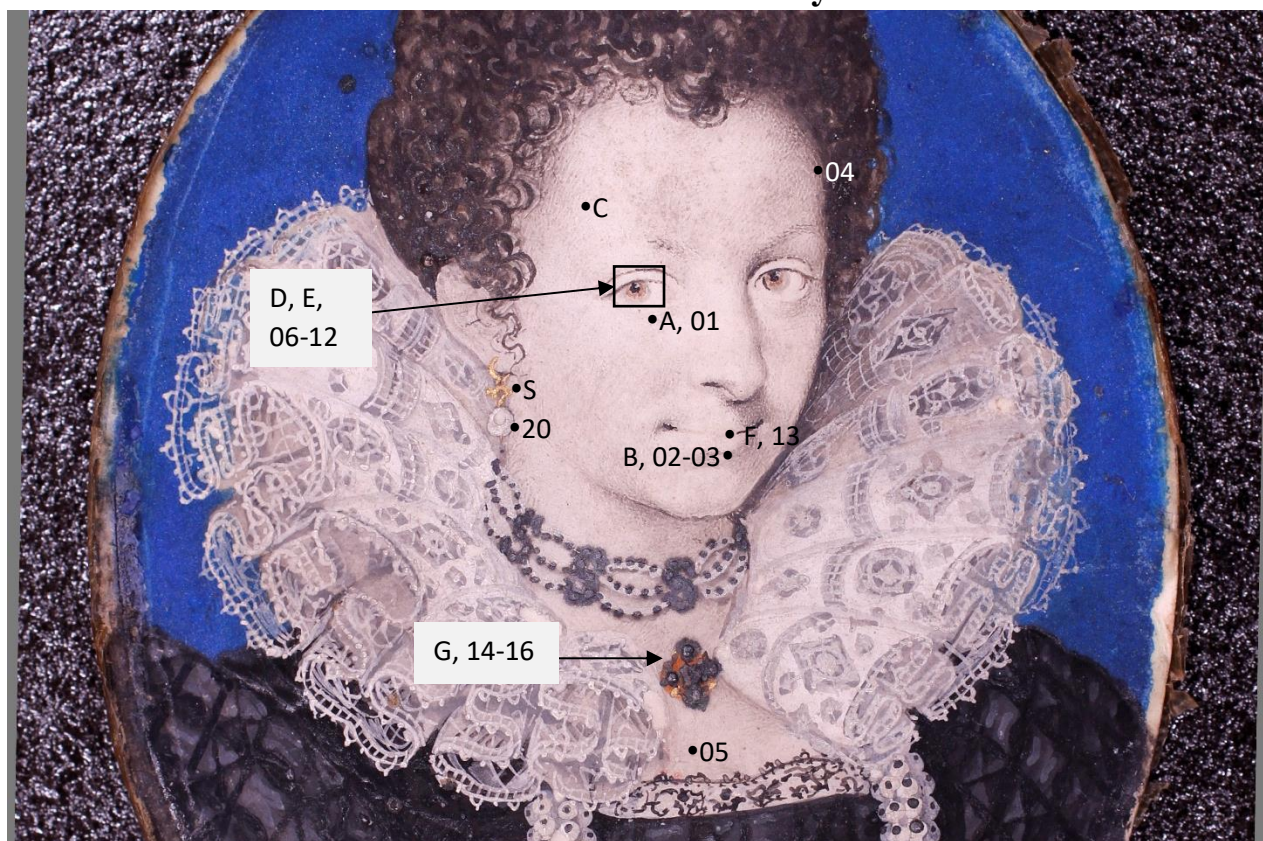

Analysis sites: letters indicate XRF spots, numbers mark Raman spots.

| Area                     | Detail                     | XRF                      | Raman                                       | Visual examination                                    | Notes                                                                      |
|--------------------------|----------------------------|--------------------------|---------------------------------------------|-------------------------------------------------------|----------------------------------------------------------------------------|
| Flesh tones (A-C, 01-05) | Cheek (under the eye)      | <b>Pb</b> , Ca, Fe       | Lead white                                  | Surface is white with finely divided black particles. |                                                                            |
|                          | Forehead (lacuna)          | Pb, Fe, Ca               |                                             |                                                       |                                                                            |
|                          | Forehead (shadow)          | -                        | Vermilion                                   | Several big crimson particles.                        |                                                                            |
|                          | dark area (under the lips) | <b>Pb</b> , Fe, Ca       | Carbon black, lapis lazuli, red lead        |                                                       | Lapis only in shadowed area, very few orange, rare vermillion (not saved). |
|                          | Cleavage                   | -                        | Vermilion                                   | Large and small red particles                         |                                                                            |
| Eyes (D, E, 06-12)       | Brown iris                 | <b>Pb</b> , Fe, Ca, (Cu) | Hematite, lead white, calcite, carbon black | Particles dispersed in a yellow wash.                 | No identification on the yellow wash.                                      |
|                          | Eyelash line               | -                        | Carbon black                                | Only black particles                                  | Eyelid line and eyebrows looked the same: only black particles.            |
| Lips (F, 13)             | Centre                     | <b>Pb</b> , Fe, Ca       | Red lead                                    | diluted pink lake, rare orange particles              | Dilute pink lake                                                           |
| Jewel (G, 14-16)         | Red area                   | <b>Pb</b> , Fe, Ca       | Red lead, goethite                          | Orange and red crystals mixed with black ones         |                                                                            |



## E.1178-1988 – Robert Devereux

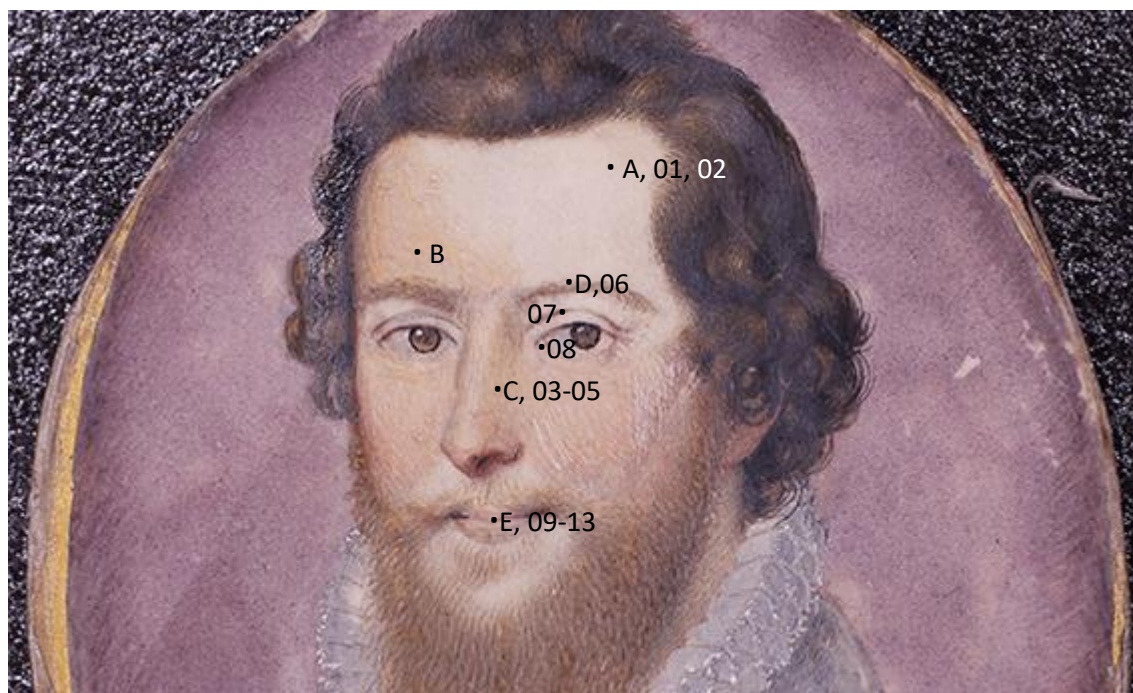

**Analysis sites: numbers mark Raman spots, letters indicate XRF spots.**

| Area                    | Detail                | XRF                                        | Raman                         | Visual examination                                                                                                                                   | Notes                                                                                                                       |
|-------------------------|-----------------------|--------------------------------------------|-------------------------------|------------------------------------------------------------------------------------------------------------------------------------------------------|-----------------------------------------------------------------------------------------------------------------------------|
| Forehead (A, B, 01, 02) | Top, proper left side | <u>Pb</u> , Fe, Ca, (Hg)                   | Lead white, gypsum, vermilion | Pure white matrix with very few finely divided black particles, occasional clusters of crimson red and pale orange particles and a single orange one | The original area under the nose showed also yellow particles. The retouched area on the right side consisted of Ca and Ba. |
| Nose (C, 03-05)         | Middle area           | <u>Ca</u> , Ba, <u>Pb</u> , Fe, (Hg), (Cu) | Calcite, hematite             | White with red particles, some splodges of yellow lake and occasionally maroon crystals                                                              | Retouched area                                                                                                              |
| Eyebrow (D, 06)         | Proper left one       | <u>Pb</u> , Ca, Fe, Hg, Mn                 | -                             | Mixture of black, red and dark yellow particles                                                                                                      | Retouched area<br>No spectrum from the yellow particles (yellow ochre?)                                                     |
| Eyelid (07)             | Proper left one       | -                                          | Carbon black, vermilion       | Black and crimson particles                                                                                                                          | Crimson particles could appear as orange ones                                                                               |
| Inner corner (08)       | PL eye                | -                                          | Vermilion                     | Mix of red and a few orange particles                                                                                                                | Probably retouched                                                                                                          |
| Mouth E, 09-13)         |                       | <u>Pb</u> , Ca, Hg, Fe, (Ba), (Mn)         | Vermilion                     | Mixture of red and black particles, a few pale blue ones, and a pale pink lake                                                                       | Retouched area<br>A medium-rich layer seems to be put on top<br>Likely orange particles underneath                          |

## 630-1882 – possibly Sir Philip Sidney

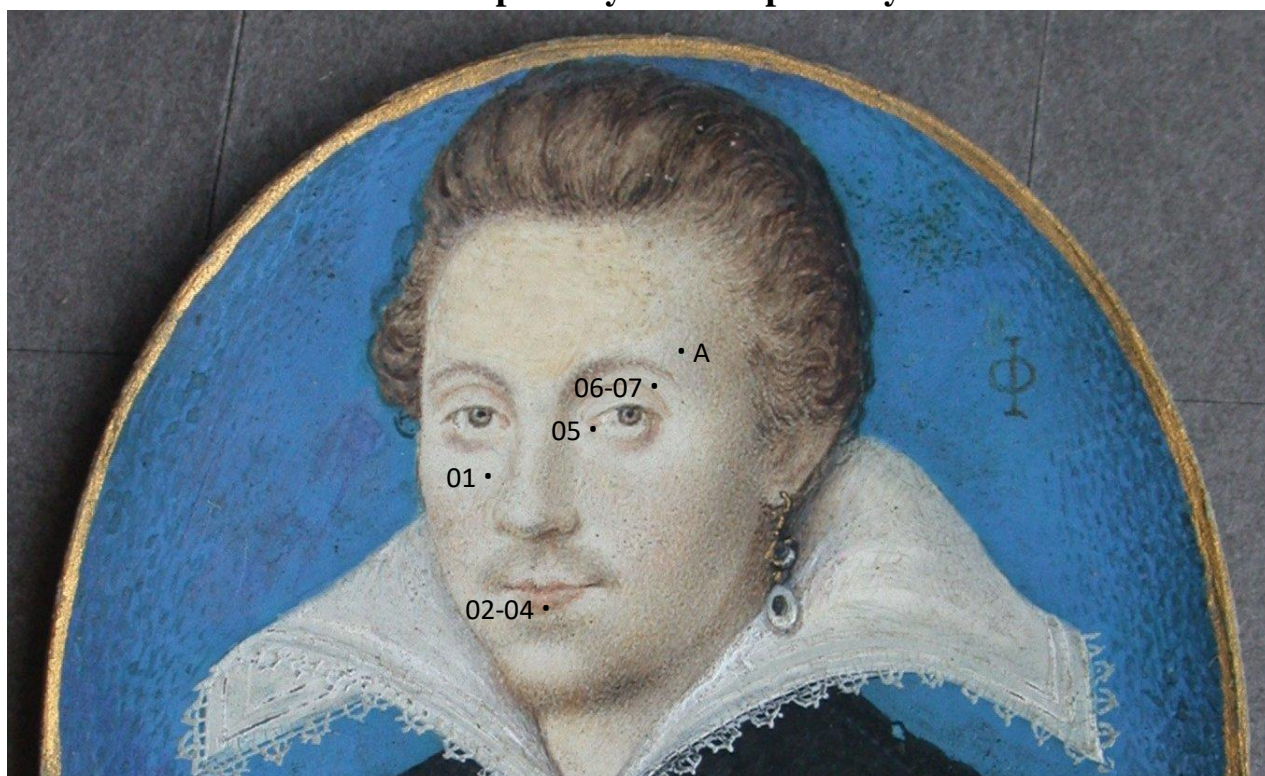

Analysis sites: numbers mark Raman spots, letters indicate XRF spots.

| Area                   | Detail                      | XRF        | Raman                        | Visual examination                                                                                   |
|------------------------|-----------------------------|------------|------------------------------|------------------------------------------------------------------------------------------------------|
| Flesh tones<br>(A, 01) | Forehead<br>(original area) | Pb, Ca, Fe | -                            |                                                                                                      |
|                        | Cheeks                      | -          | Azurite                      | Red particles of vermilion mixed with very rare orange (red lead-looking) and a few azurite.         |
| Mouth (02-04)          |                             | -          | Red lead, vermilion, azurite | Mixture of red particles (vermilion), orange particle (red lead), pale blue (azurite) and black ones |
| Eyes (05-07)           | Inner corner                | -          | vermilion, red lead          | Particles of different colour that looked like vermilion, red lead and carbon black                  |
|                        | Eyelash line                | -          | carbon black, vermilion      | Mixture of finely divided black particles mixed with vermilion.                                      |
|                        | Eyelid line                 | -          | -                            | Mixture of vermilion and carbon black                                                                |



## FM 3869 - Ludovic Stuart

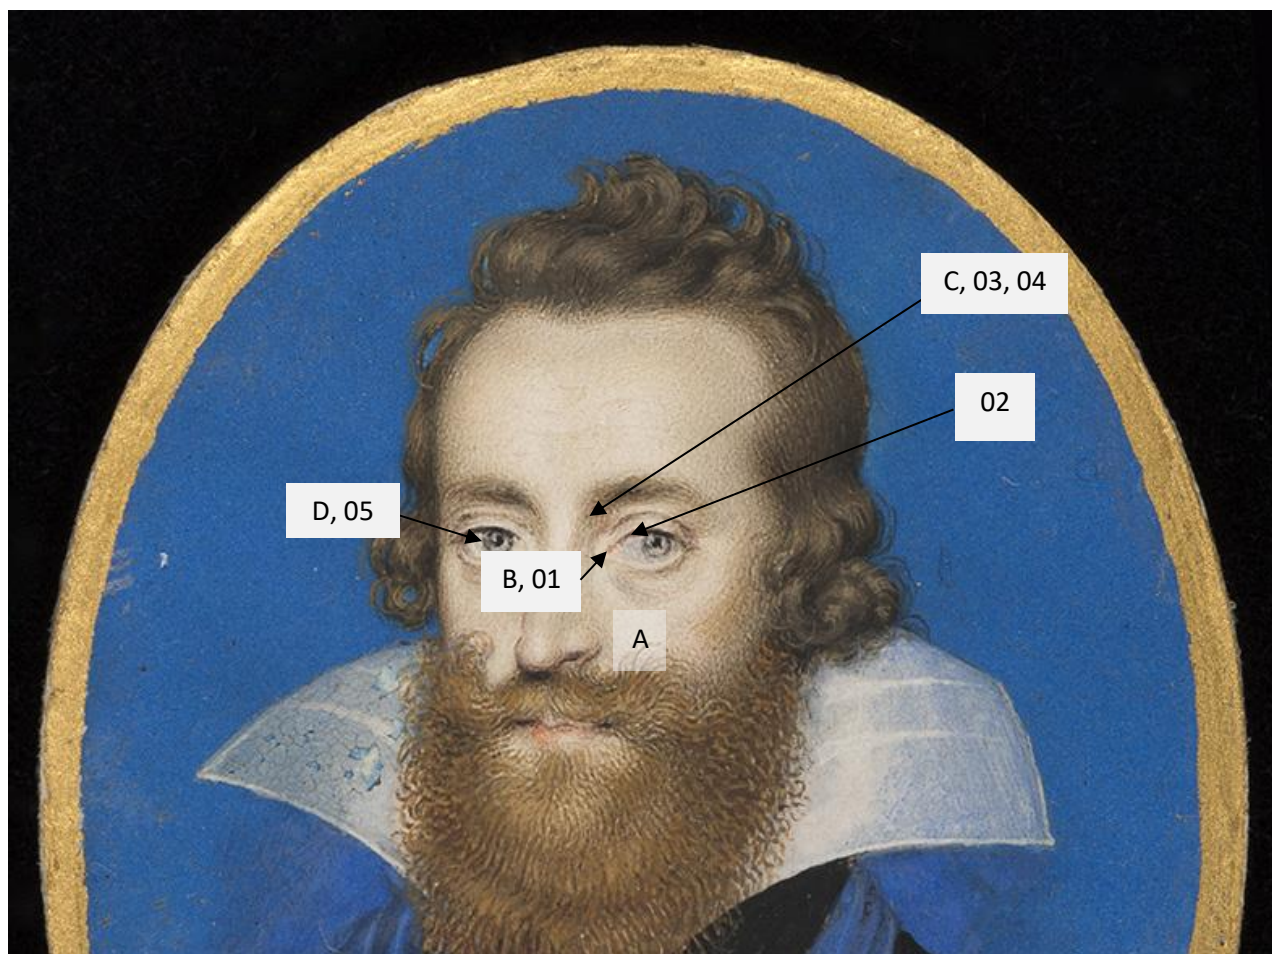

Analysis sites: numbers mark Raman spots, letters indicate XRF spots.

| Area               | Detail                               | XRF                | Raman               | Visual examination                                         | Notes                                                                                            |
|--------------------|--------------------------------------|--------------------|---------------------|------------------------------------------------------------|--------------------------------------------------------------------------------------------------|
| Flesh tones (A)    | Proper left cheek                    | <b>Pb</b> , Ca, Fe | -                   | Orange, red and finely divided black particles             | Possibly red lead, vermilion and carbon black                                                    |
| Eyes area (B, 1-5) | Inner corner (B, 01)                 | <b>Pb</b>          | Red lead            | Orange particles                                           |                                                                                                  |
|                    | Eyelash line (02)                    |                    | Vermilion           | Mixture of red and black particles                         | Likely carbon black                                                                              |
|                    | Red hatches on the eyelid (C, 03-04) | <b>Pb</b> , Fe     | Vermilion, red lead | Black and red particles with a few orange ones             | Likely carbon black                                                                              |
|                    | Iris (D, 05)                         | Pb                 | Indigo              | White matrix scattered with finely divided black particles | No indigo was detected on the proper right eye (no blue colour was visible under the microscope) |

## FM 3902 – Unknown woman in a floral dress

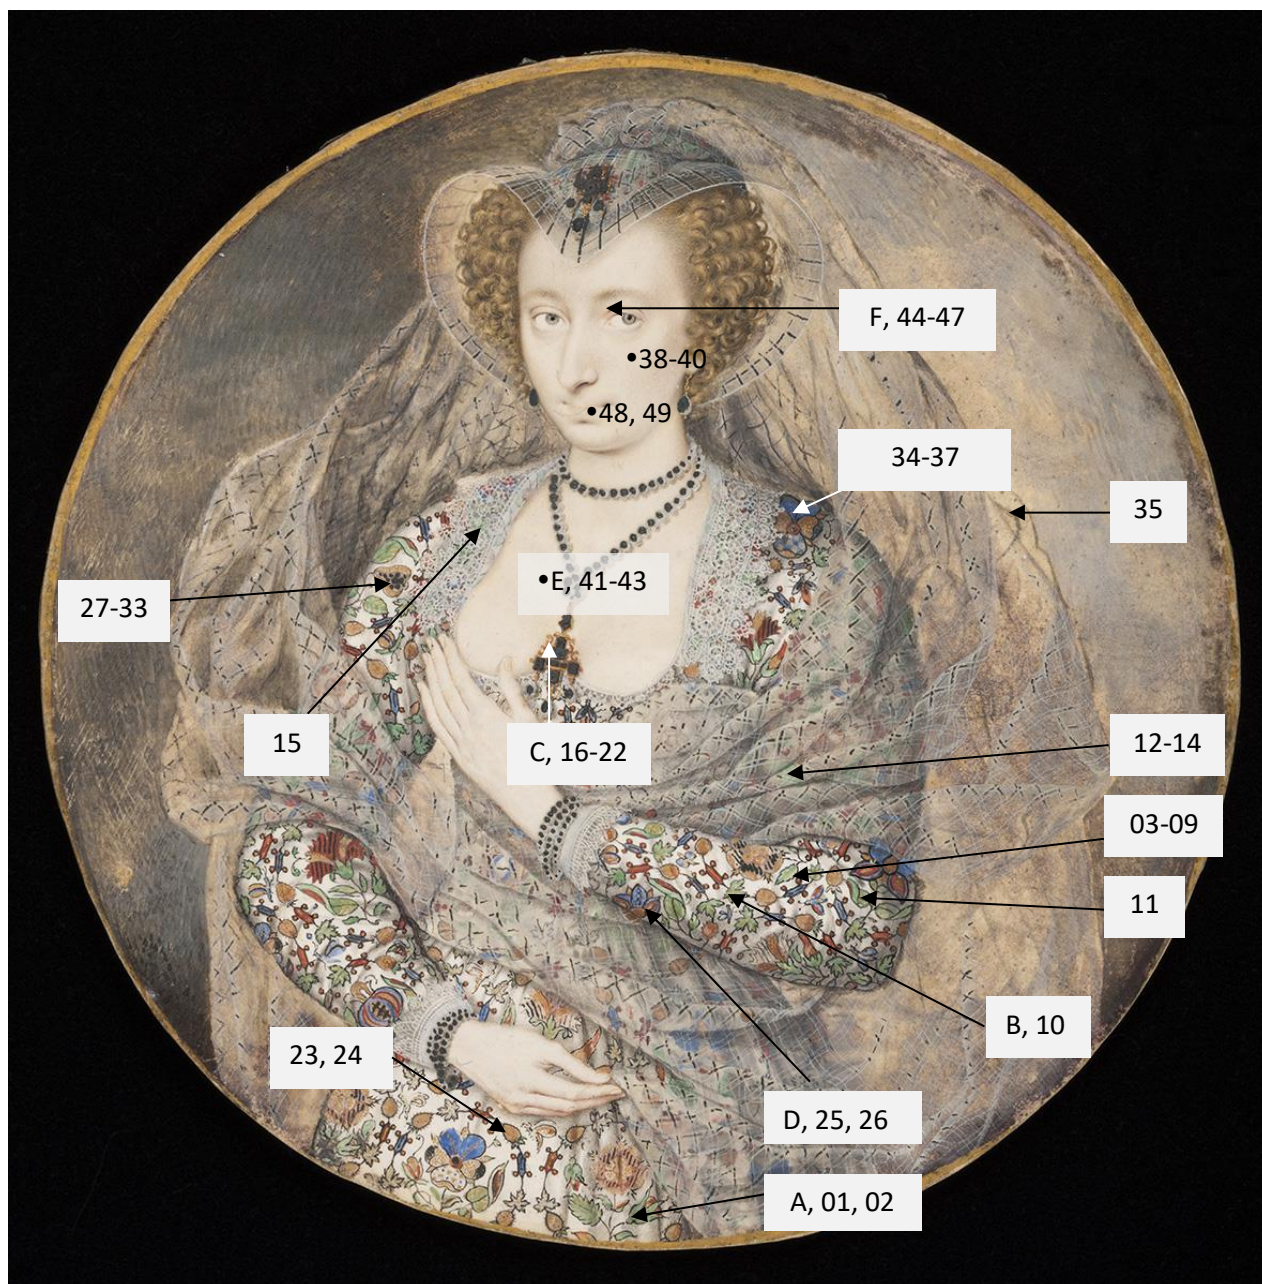

Analysis sites: numbers mark Raman spots, letters indicate XRF spots.



| Area                                | Detail                              | XRF                               | Raman                                                            | Visual examination                                                                    | Notes                                              |
|-------------------------------------|-------------------------------------|-----------------------------------|------------------------------------------------------------------|---------------------------------------------------------------------------------------|----------------------------------------------------|
| Green areas<br>(A, B, 01-15)        | Green leaf (03-09)                  |                                   | Brochantite, lead white, azurite, lapis lazuli                   | Aqua-coloured crystals, a few pale blue and one dark blue                             | Yellow dye                                         |
|                                     | Green leaf (A, 01-02)               | <b>Cu</b> , Pb, Ca, Si, Al, Fe    | Azurite, indigo                                                  | Large and small green/aqua particles, with a few blue ones that looked like azurite   |                                                    |
|                                     | Green leaf with golden dots (B, 10) | <b>Cu</b> , Si, Ca, S, Al         | Brochantite, lead white                                          |                                                                                       | Yellow dye                                         |
|                                     | Green leaf (near red) (11)          |                                   | Brochantite                                                      |                                                                                       |                                                    |
|                                     | Leaves under the veil (12-15)       |                                   | Brochantite, lead white, calcite, indigo, goethite, carbon black |                                                                                       |                                                    |
| Orange areas<br>(C-D, 16-26, 27-37) | Pendant (C)                         | <b>Pb</b> , As, Ca, Fe, Si, Al, K | Pararealgar, hematite, vermillion                                | mixture of different types of orange, some crimson red and some dark red particles    |                                                    |
|                                     | Strawberry                          |                                   | Pararealgar                                                      | orange particles mixed with white and black ones                                      |                                                    |
|                                     | Flower (D)                          | <b>Pb</b> , As, Fe, Al, Si        | Pararealgar                                                      | mixture of dark red and orange particles                                              |                                                    |
|                                     | Pear                                |                                   | Pararealgar                                                      | dark orange and yellow particles, mixed with finely divided black and a few blue ones |                                                    |
|                                     | Pansy                               |                                   | Pararealgar                                                      | orange particles mixed with black and white ones                                      |                                                    |
| Flesh tones<br>(E, 38-43)           | Right cheek (38-40)                 |                                   | Lead white, vermillion, red lead                                 | Mostly white, very few crimson, orange and finely divided black                       |                                                    |
|                                     | Chest (E, 41-43)                    | <b>Pb</b> , Ca                    | Lead white, vermillion, red lead                                 | Mostly white, very few crimson, orange and finely divided black                       |                                                    |
| Eyes (F, 44-47)                     | Eye's corner (F, 44-45)             | Hg                                | Vermilion, red lead                                              | Crimson red, orange and finely divided black                                          | Possibly carbon black                              |
|                                     | Eyelashes line (46-47)              |                                   | Vermilion, carbon black                                          | Mix of variable size red and black particles                                          | Possible same composition even for the eyelid line |
| Mouth                               | Centre (48-49)                      | -                                 | Red lead, vermillion                                             | Bright orange particles mixed with a few red ones                                     | Pink lake?                                         |

## FM 3903 – Henry Frederick

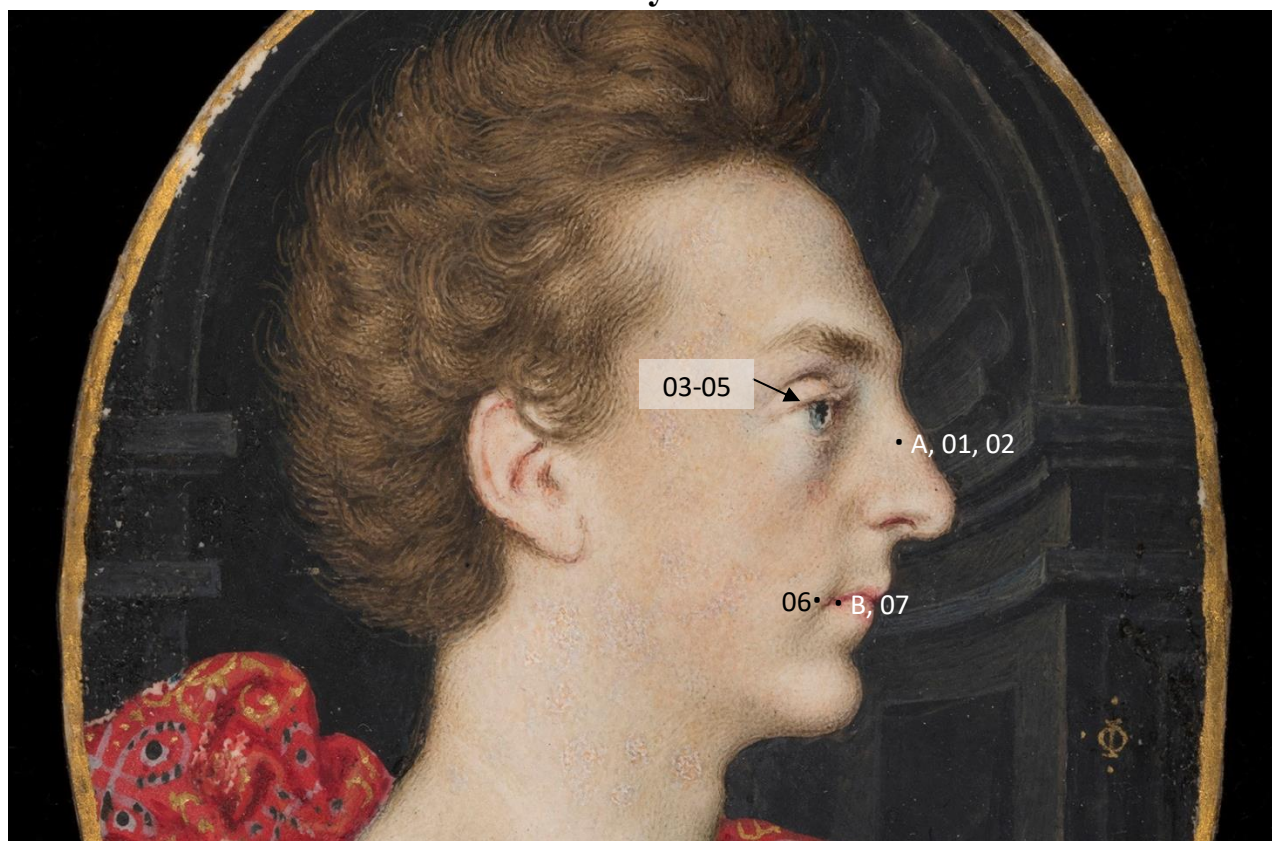

Analysis sites: numbers mark Raman spots, letters indicate XRF spots.

| Area                       | Detail        | XRF                    | Raman                               | Visual examination                                                        | Notes                                                 |
|----------------------------|---------------|------------------------|-------------------------------------|---------------------------------------------------------------------------|-------------------------------------------------------|
| Flesh tones<br>(A, 01, 02) | Nose and neck | <b>Pb</b> , Ca, Fe, Si | Red lead, vermilion, lead white     | White matrix scattered with orange particles and a few red ones           | Indigo on the nose bridge                             |
| Eyelash line<br>(03-05)    |               |                        | Carbon black, hematite and red lead | Purple colour made with black, maroon or dark red, a few orange particles |                                                       |
| Mouth (B, 06, 07)          | Lower lip     | <b>Pb</b> , Ca, Fe, Si | Red lead                            | Mostly made of a pink lake with orange particles on the lower lip         | Pink lake<br>Corner: indigo and possibly carbon black |

## P.129-1910 – Unknown gentleman

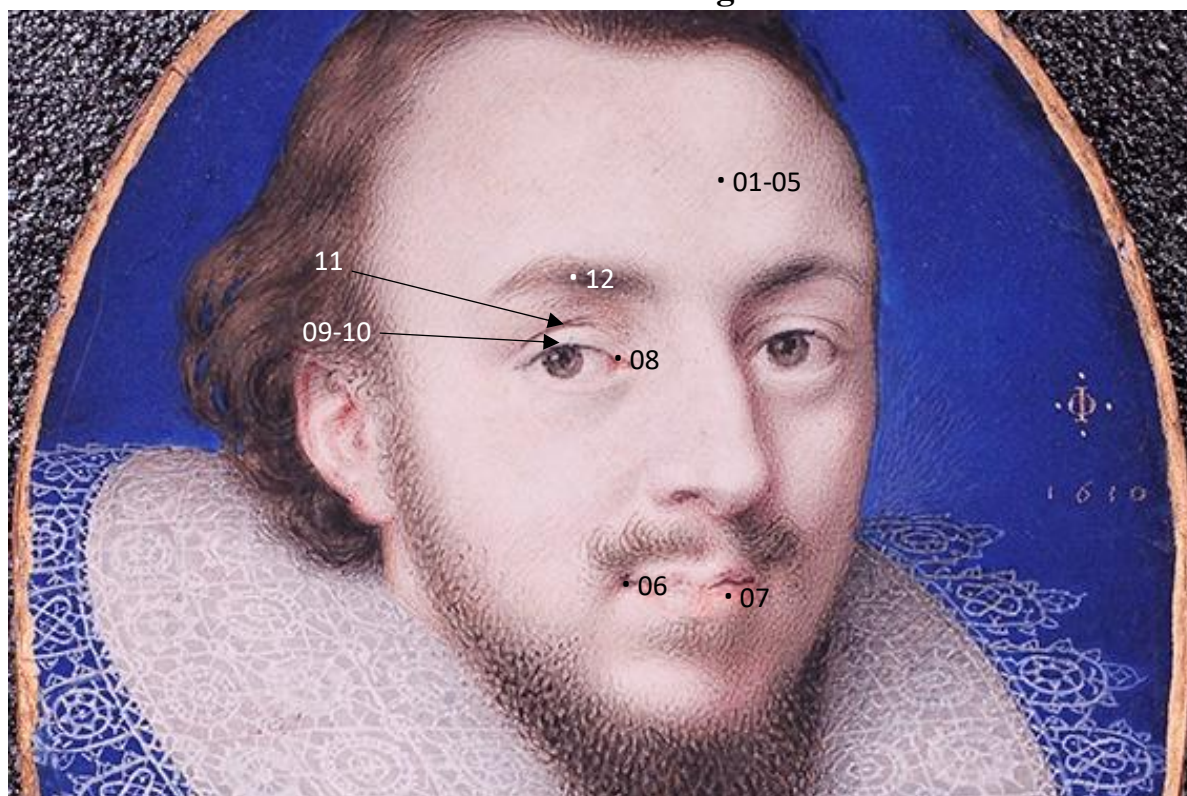

Analysis sites: numbers mark Raman spots, letters indicate XRF spots.

| Area                | Detail               | Raman                                                | Visual examination                                                                                                 | Notes                                                         |
|---------------------|----------------------|------------------------------------------------------|--------------------------------------------------------------------------------------------------------------------|---------------------------------------------------------------|
| Flesh tones (01-05) | White area           | Red lead, lead tin yellow type I, goethite, hematite | Mixture of small-sized pale orange particles, boulders and acicular yellow ones and a few red and brown ones       | No vermilion seen.                                            |
| Mouth (06, 07)      | PR corner            | Hematite, carbon black                               | Mixture of maroon and black particles                                                                              | Possibly a dark pink lake was used                            |
|                     | Lower lip            | Red lead                                             | Mostly orange particles                                                                                            |                                                               |
| Eyes (08-12)        | Inner corner (08)    | Red lead                                             | Orange particles                                                                                                   | Some light brown lines were drawn on top                      |
|                     | Eyelash line (09-10) | 1 <sup>st</sup> line: hematite and carbon black      | 1 <sup>st</sup> line: maroon and black particles<br>2 <sup>nd</sup> line on top: mostly black                      |                                                               |
|                     | Eyelid line (11)     | 1st line: goethite and carbon black                  | 1 <sup>st</sup> line: acicular yellow particles and black ones<br>2 <sup>nd</sup> line: maroon and black particles | 2 <sup>nd</sup> line likely made of hematite and carbon black |
|                     | Eyebrow (12)         | Red lead                                             | Black matrix scattered with a few acicular yellow and occasional orange particles                                  | The presence of carbon black and goethite was assumed         |



### P.39-1941 – Unknown woman

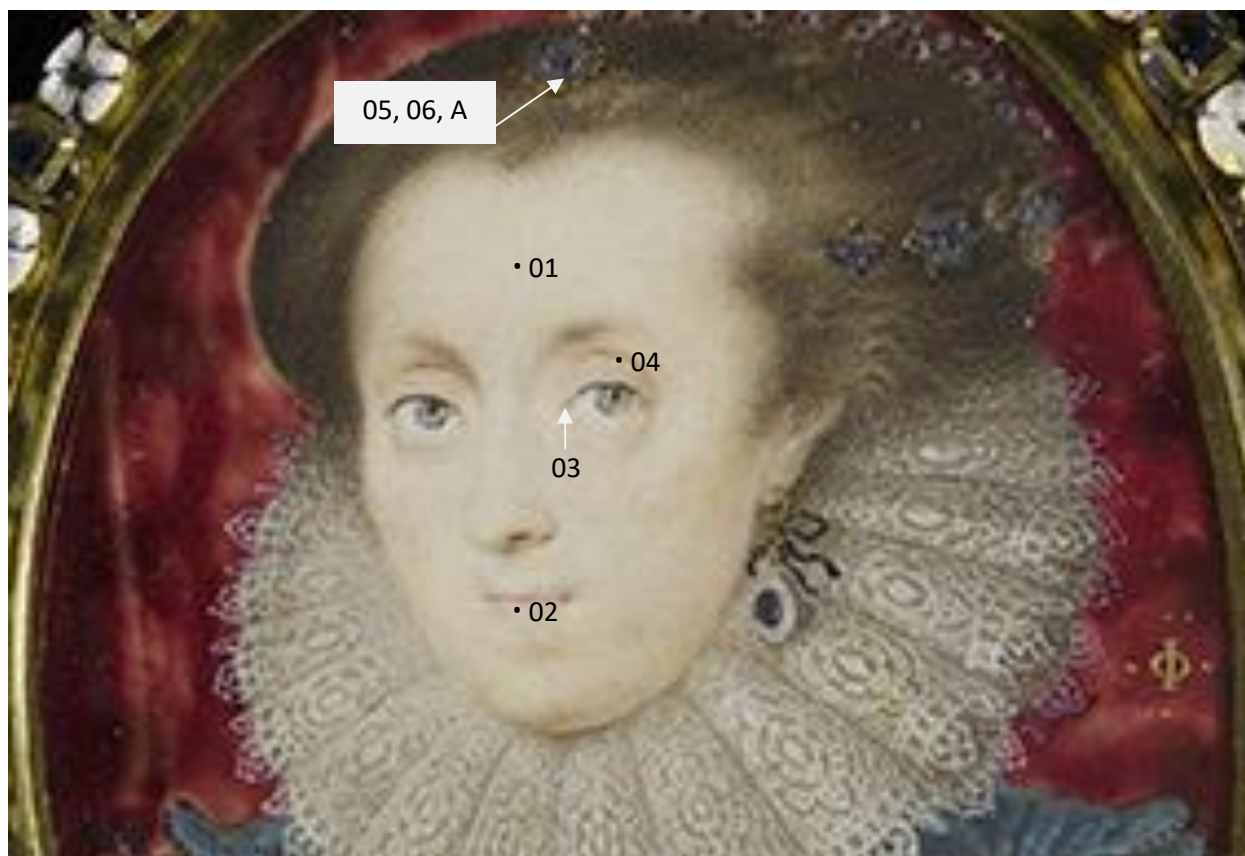

Analysis sites: numbers mark Raman spots, letters indicate XRF spots.

| Area                   | Detail            | XRF                   | Raman              | Visual examination                                                                                                                                    | Notes        |
|------------------------|-------------------|-----------------------|--------------------|-------------------------------------------------------------------------------------------------------------------------------------------------------|--------------|
| Flesh tones (01)       | Forehead          | -                     | red lead, hematite | Red lead, hematite and some bright yellow particles                                                                                                   | No vermilion |
| Mouth (02)             |                   | -                     | red lead           | Lips: red lead<br>Central line: pink lake with blue particles (azurite or lapis)                                                                      |              |
| Eyes (03-04)           | Inner corner (03) | -                     | red lead           | Mixture of red lead and a pale pink dye with blue particles                                                                                           |              |
|                        | Eyelash line (04) | -                     | carbon black       | Lower grey line: finely divided carbon black particles<br>Upper line: large red lead particles, medium sized carbon black and finely divided hematite |              |
|                        | Eyelid line       | -                     | -                  | Mixture of a pink dye, red lead, black and hematite                                                                                                   |              |
| Head jewel (A, 05, 06) |                   | <b>Fe, Pb, Au, Ca</b> | Goethite, hematite | Dull red-orange surface                                                                                                                               |              |

## FM 3865 – Richard Sackville

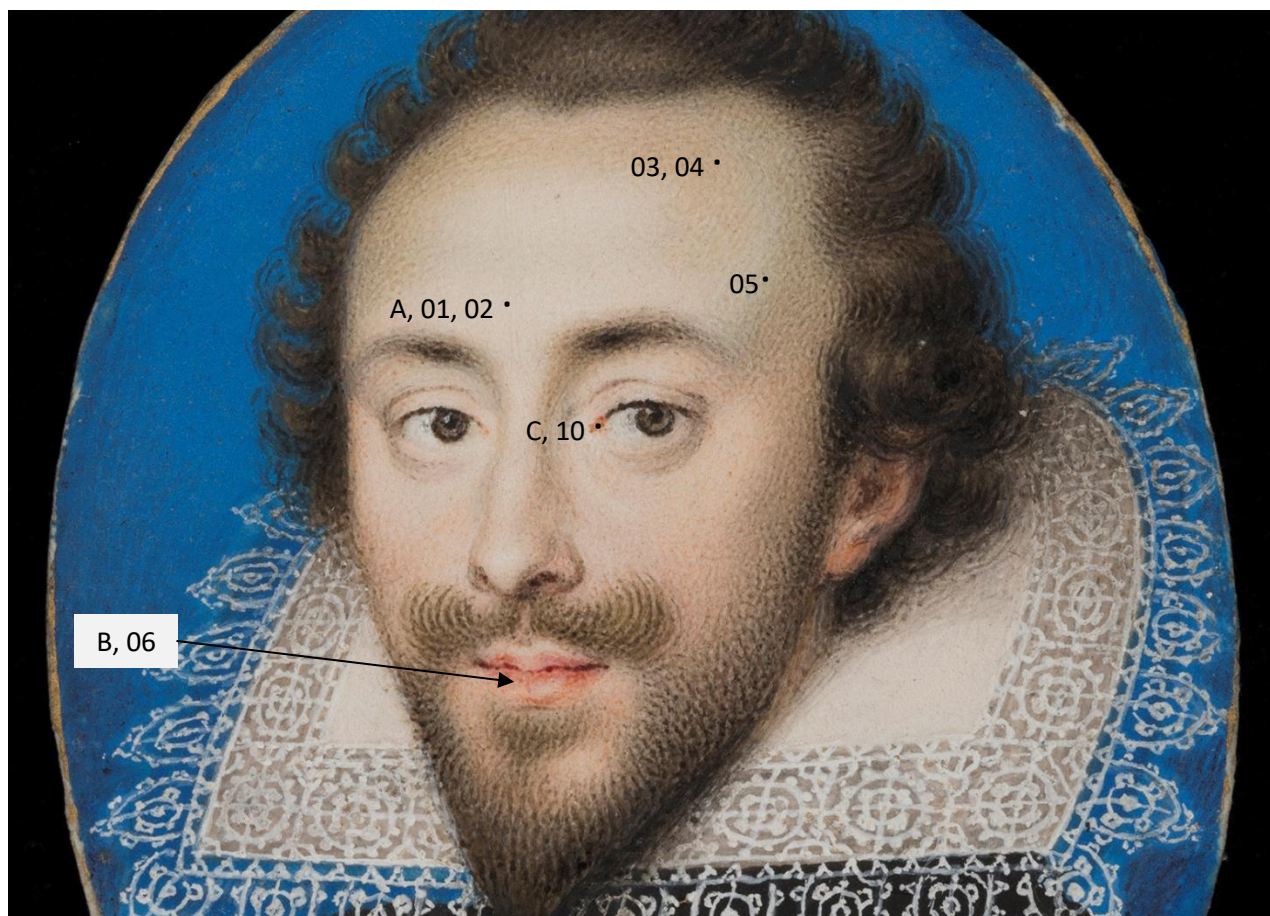

Analysis sites: numbers mark Raman spots, letters indicate XRF spots.

| Area                   | Detail                | XRF                | Raman            | Visual examination                                                                                                                                         | Notes                                        |
|------------------------|-----------------------|--------------------|------------------|------------------------------------------------------------------------------------------------------------------------------------------------------------|----------------------------------------------|
| Flesh tones (A, 01-05) | Forehead              | <b>Pb, Ca, Fe</b>  | Red lead, indigo | White matrix scattered with a few orange and black particles. Tiny yellow particles visible only under Raman microscope. In one occasion one red particle. | Yellow ochre?<br>One particles of vermillion |
|                        | Forehead, redder area | -                  | Hematite         | Redder hue obtained with a mixture of black, orange and a few maroon particles                                                                             | Carbon black and red lead also present       |
|                        | Forehead, bluer area  | -                  | Indigo           | Blue areas visible                                                                                                                                         |                                              |
| Lips (B, 06)           | Lower lip             | <b>Pb, Ca, Hg?</b> | Red lead         | Orange particles and a pink lake was the mixture used for the lips.                                                                                        | Pink lake                                    |
| Eyes (C, 10)           | Inner corner          | <b>Pb, Ca, Hg?</b> | red lead         | Orange particles                                                                                                                                           |                                              |
